# Supplementary material for: Partial inhibition of mitochondrial complex I ameliorates Alzheimer’s disease pathology and cognition in APP/PS1 female mice
Source: PubMed Central journal article supplement (PMC7794523; doi:10.1038/s42003-020-01584-y), 2021-01-08
Supplement: 42003_2020_1584_MOESM2_ESM.pdf [file 42003_2020_1584_MOESM2_ESM.pdf]

## Supplementary Information

### Partial inhibition of mitochondrial complex I ameliorates Alzheimer's disease pathology and cognition in APP/PS1 female mice

Andrea Stojakovic<sup>1,\*</sup>, Sergey Trushin<sup>1,\*</sup>, Anthony Sheu<sup>2,\*</sup>, Layla Khalili<sup>1</sup>, Su-Youne Chang<sup>3,4</sup>, Xing Li<sup>5</sup>, Trace Christensen<sup>6</sup>, Jeffrey L. Salisbury<sup>6,7</sup>, Rachel E. Geroux<sup>1</sup>, Benjamin Gateno<sup>1</sup>, Pdraig J. Flannery<sup>1</sup>, Mrunal Dehankar<sup>5</sup>, Cory C. Funk<sup>8</sup>, Jordan Wilkins<sup>1</sup>, Anna Stepanova<sup>9</sup>, Tara O'Hagan<sup>9</sup>, Alexander Galkin<sup>9</sup>, Jarred Nesbitt<sup>1</sup>, Xiujuan Zhu<sup>1</sup>, Utkarsh Tripathi<sup>1</sup>, Slobodan Macura<sup>7</sup>, Tamar Tchkonja<sup>10</sup>, Tamar Pirtskhalava<sup>10</sup>, James L. Kirkland<sup>10</sup>, Rachel A. Kudgus<sup>11</sup>, Renee A. Schoon<sup>11</sup>, Joel M. Reid<sup>11</sup>, Yu Yamazaki<sup>12</sup>, Takahisa Kanekiyo<sup>12</sup>, Song Zhang<sup>13</sup>, Emirhan Nemutlu<sup>14</sup>, Petras Dzeja<sup>13</sup>, Adam Jaspersen<sup>6</sup>, Christopher Ye In Kwon<sup>2</sup>, Michael K. Lee<sup>2,#</sup>, Eugenia Trushina<sup>1,11,#</sup>

<sup>1</sup>Department of Neurology, Mayo Clinic, 200 First St. SW, Rochester, MN 55905, USA

<sup>2</sup>Institute for Translational Neuroscience, University of Minnesota Twin Cities, 2101 6th Street SE, Minneapolis, MN 55455, USA

<sup>3</sup>Department of Neurologic Surgery, Mayo Clinic, 200 First St. SW, Rochester, MN 55905, USA

<sup>4</sup>Department of Physiology and Biomedical Engineering, Mayo Clinic, 200 First St. SW, Rochester, MN 55905, USA

<sup>5</sup>Division of Biomedical Statistics and Informatics, Department of Health Sciences Research, Mayo Clinic, 200 First St. SW, Rochester, MN 55905, USA

<sup>6</sup>Microscopy and Cell Analysis Core, Mayo Clinic, 200 First St. SW, Rochester, MN 55905, USA

<sup>7</sup>Department of Biochemistry and Molecular Biology, Mayo Clinic, 200 First St. SW, Rochester, MN 55905, USA

<sup>8</sup>Institute for Systems Biology, Seattle, WA, 98109-5263, USA

<sup>9</sup>Division of Neonatology, Department of Pediatrics, Columbia University, 116th St & Broadway New York, NY 10027, USA

<sup>10</sup>Robert and Arlene Kogod Center on Aging, Mayo Clinic, 200 First St. SW, Rochester, MN 55905, USA

<sup>11</sup>Department of Molecular Pharmacology and Experimental Therapeutics, Mayo Clinic, 200 First St. SW,  
Rochester, MN 55905, USA

<sup>12</sup>Department of Neuroscience, Mayo Clinic, 4500 San Pablo Road, Jacksonville, FL 32224, USA

<sup>13</sup>Department of Cardiovascular Medicine, Mayo Clinic, 200 First St. SW, Rochester, MN 55905, USA

<sup>14</sup>Faculty of Pharmacy, Department of Analytical Chemistry, Hacettepe University, Sıhhiye, Ankara,  
06100, Turkey

\*These authors contributed equally

#These authors jointly supervised this work

Corresponding author:           Eugenia Trushina, Ph.D.  
                                          200 First Street SW, Guggenheim Bld  
                                          Room 1542B  
                                          Rochester, MN 55905  
                                          USA  
                                          Phone: 507-284-8197  
                                          [trushina.eugenia@mayo.edu](mailto:trushina.eugenia@mayo.edu)

**a)**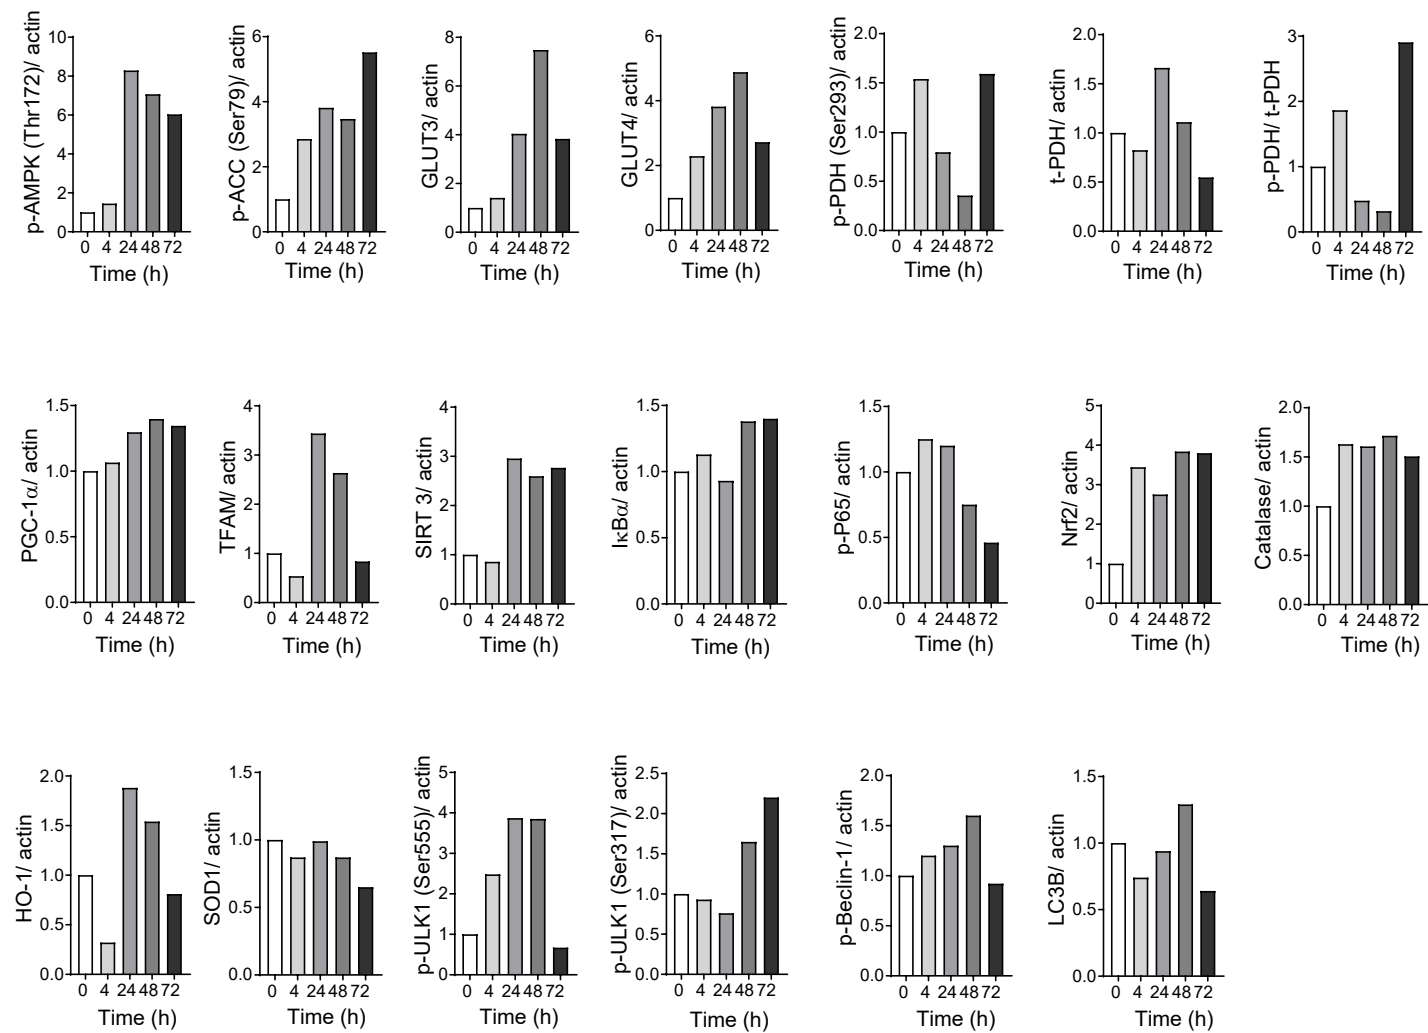**b)**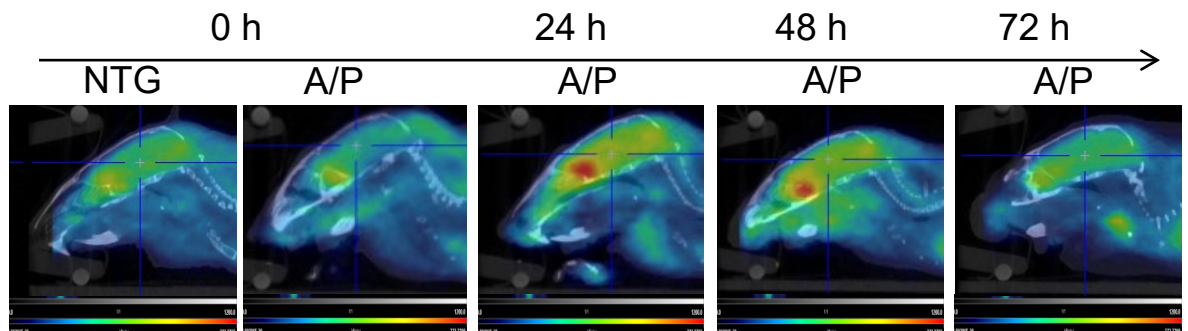

**Supplementary Figure 1. CP2 activates AMPK-dependent neuroprotective pathways in symptomatic APP/PS1 mice and improves glucose uptake in the brain. a)** Quantification of time-dependent changes in levels of key proteins involved in multiple neuroprotective pathways in the brain of symptomatic APP/PS1 mice acutely gavaged with CP2 from experiments described in Figure 1e (25 mg/kg,  $n = 1$  per time point) using Western blot analysis. **b)** Representative FDG-PET images collected from the independent cohort of APP/PS1 mice (9-10-month-old) before CP2 administration and 24, 48 and 72 h after a single dose via gavage (25 mg/kg, Figure 1e,h). NTG, untreated non-transgenic age- and sex-matched littermates. NTG,  $n = 3$  female mice per group and APP/PS1,  $n = 3$  female mice per group.

# Western blots for Fig. 1

Figure 1f

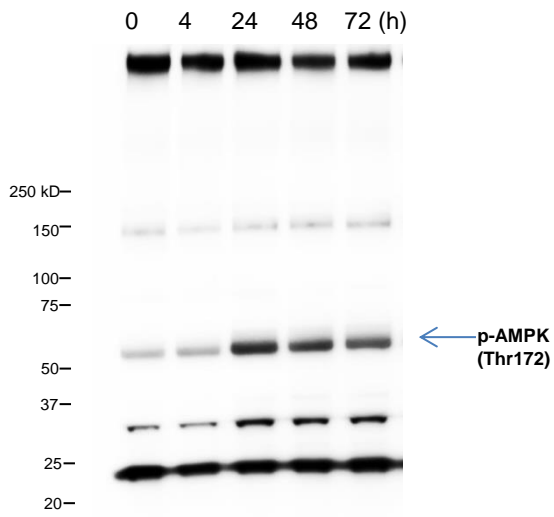

Figure 1f

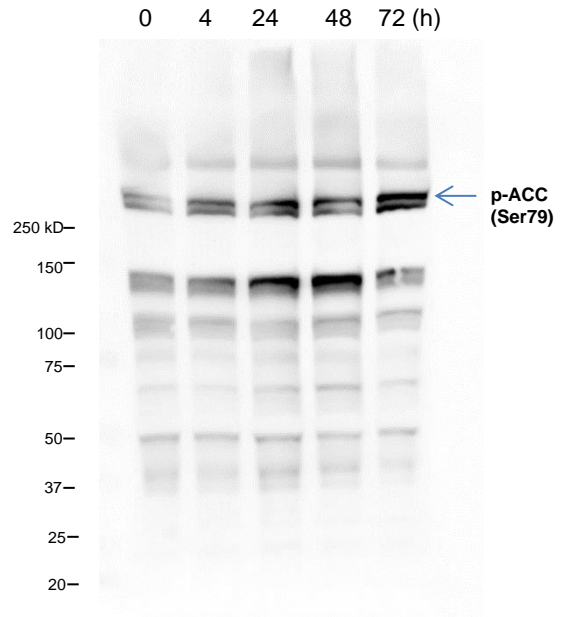

Figure 1g

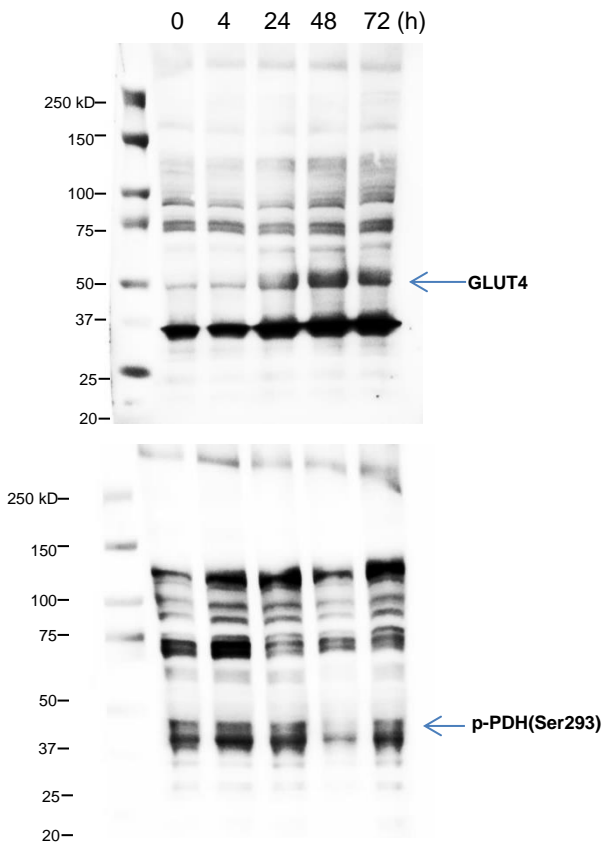

Figure 1g

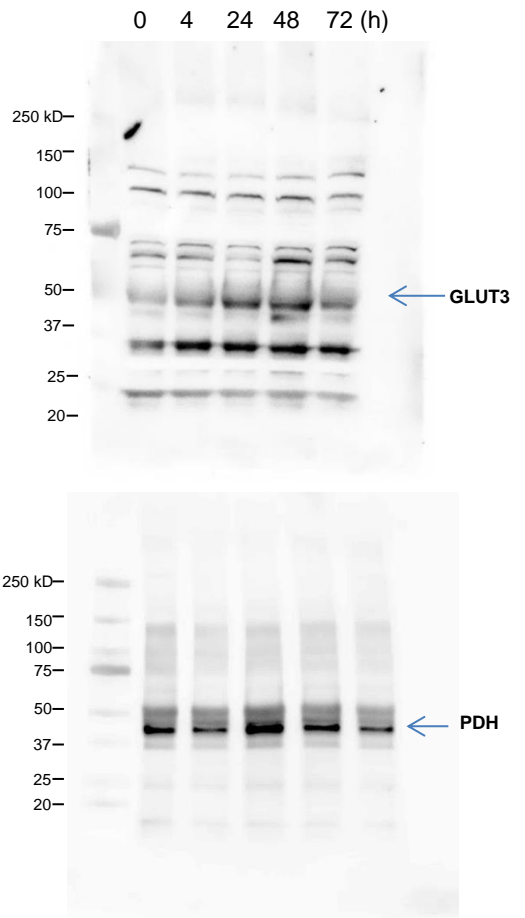

# Western blots for Fig. 1

Figure 1i

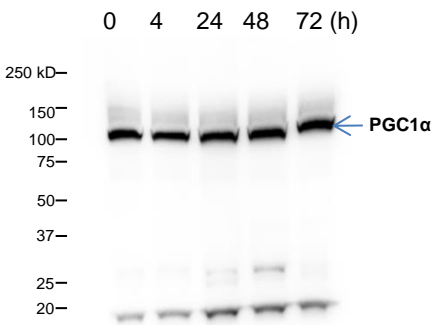

Figure 1i

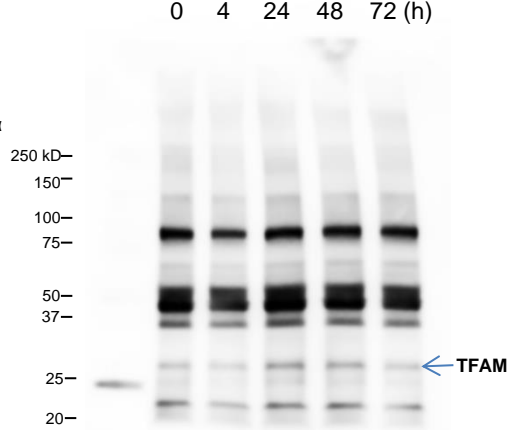

Figure 1i

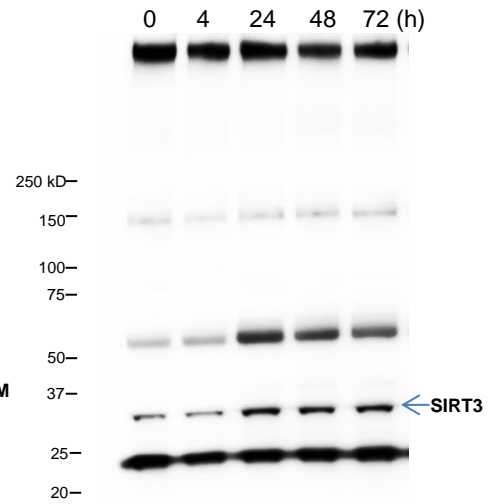

Figure 1j

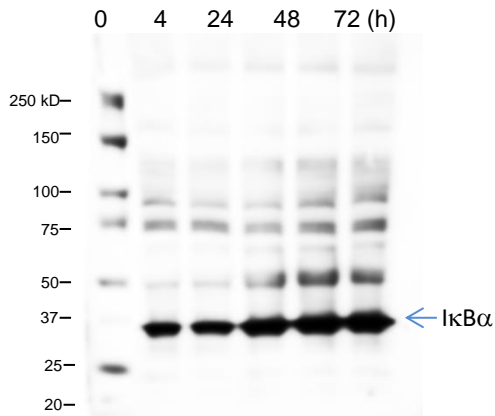

Figure 1j

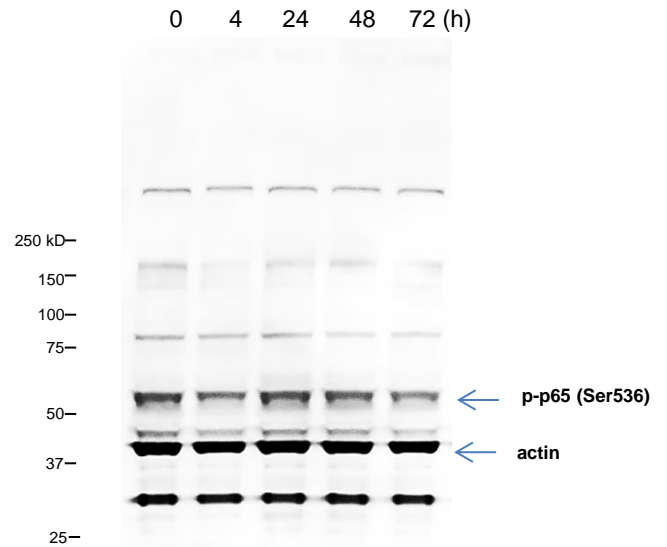

Figure 1k

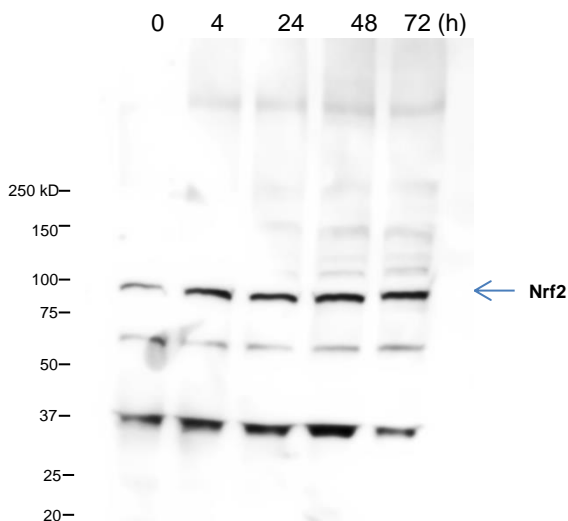

Figure 1k

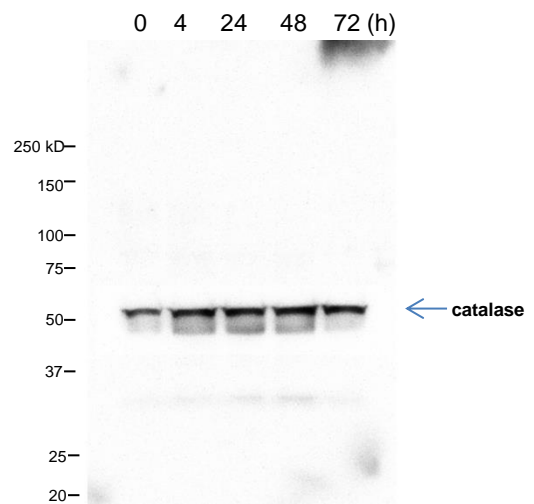

# Western blots for Fig. 1

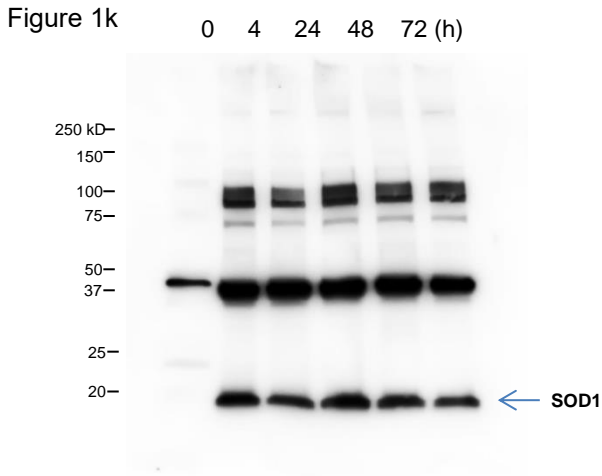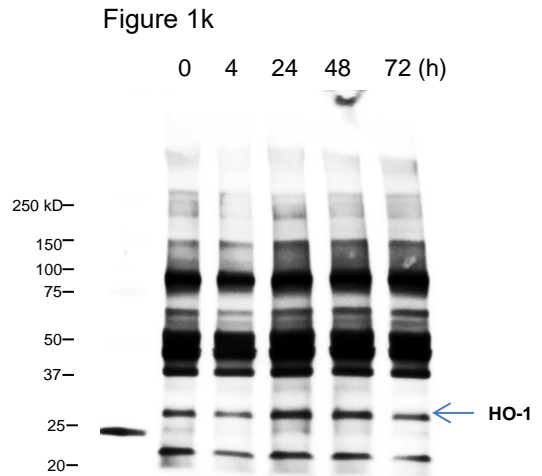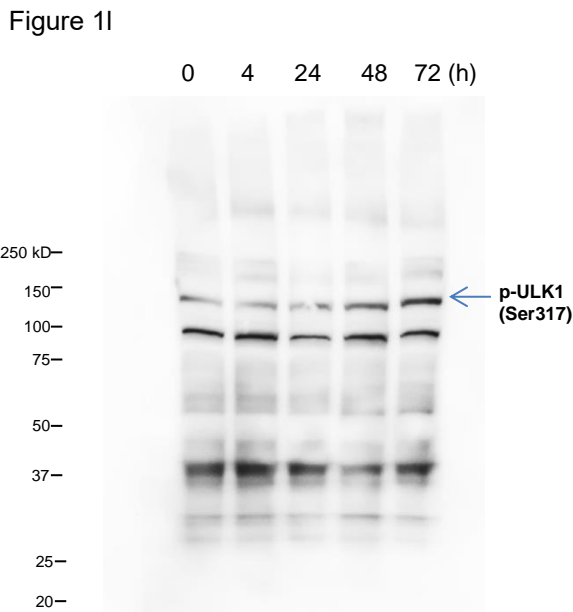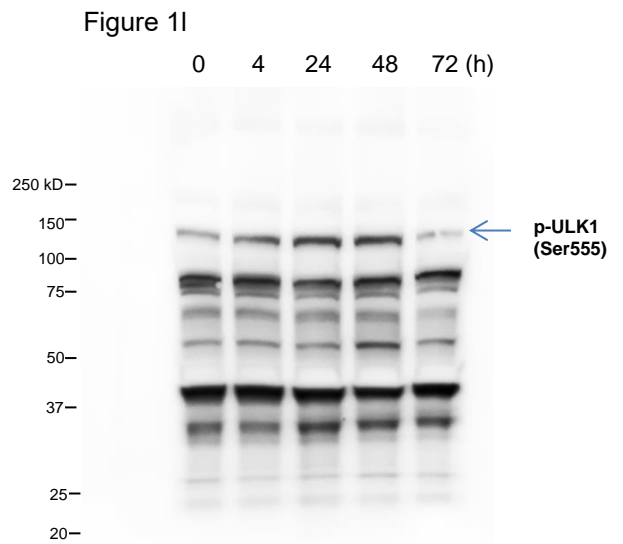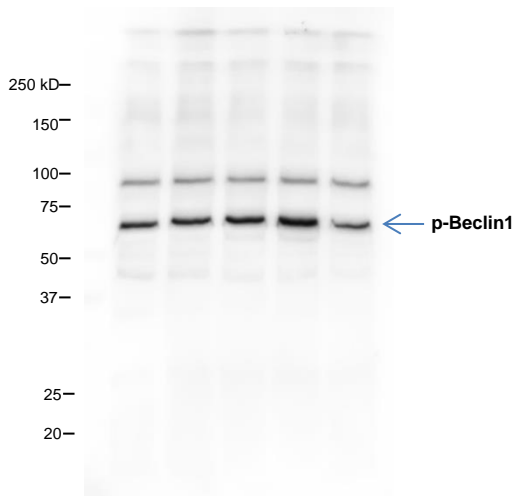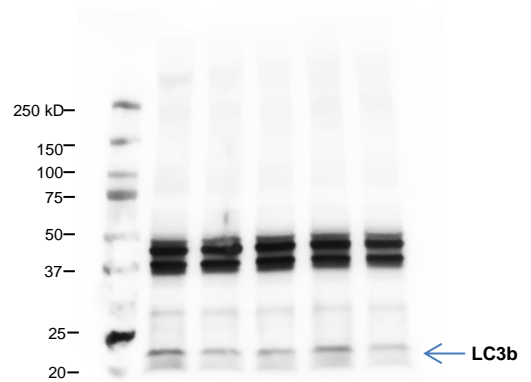

**Supplementary Figure 2. Original uncropped Western blot images for Figure 1e-l.** Time course of the expression of key proteins in each of the AMPK-dependent neuroprotective pathways depicted in Figure 1d in the brain tissue of symptomatic APP/PS1 mice 9 months of age acutely gavaged with 25 mg/kg of CP2. One mouse was taken for each time point. Blue arrows indicate the bands shown in Figure 1f-l.

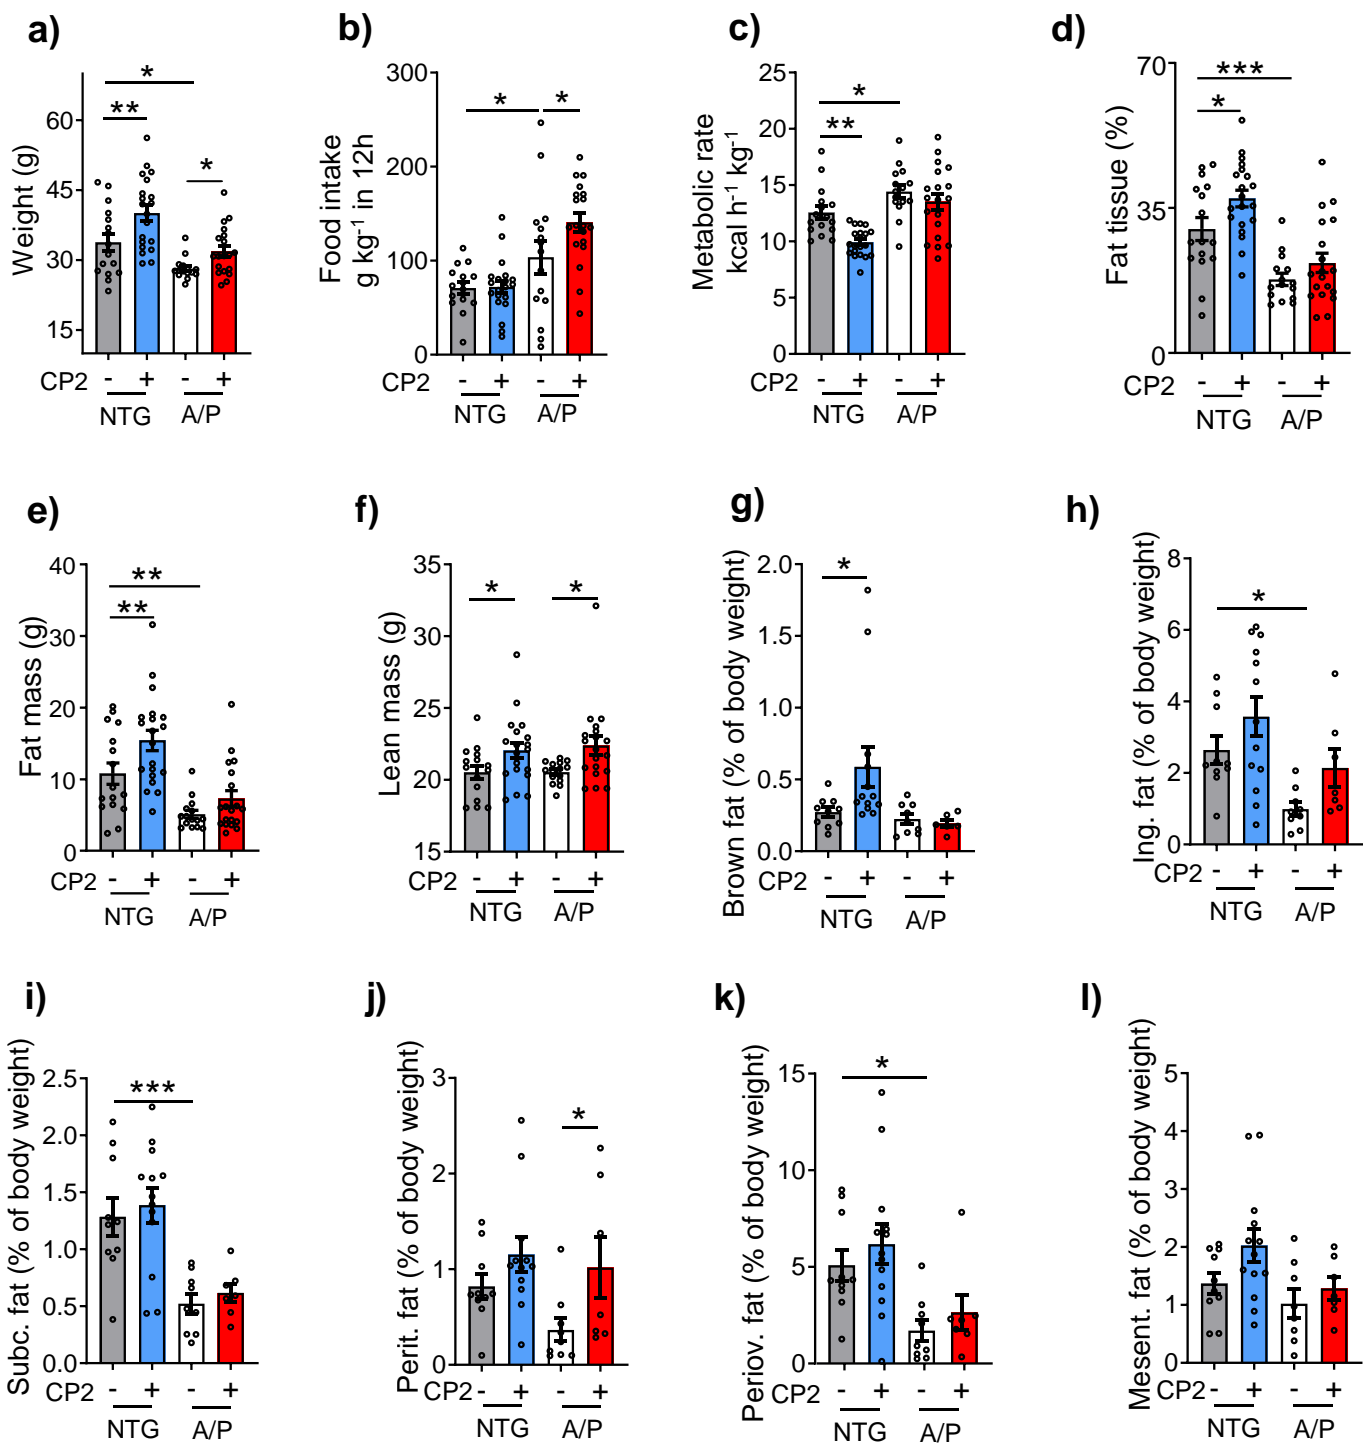

**Supplementary Figure 3. CP2 treatment ameliorates body weight loss in symptomatic APP/PS1 mice.** **a)** Body weight was significantly increased in CP2-treated NTG and APP/PS1 mice relative to untreated counterparts. Vehicle-treated APP/PS1 mice were significantly lighter compared to untreated NTG mice. CP2-treated APP/PS1 mice did not differ significantly from vehicle-treated NTG mice. **b)** Food intake was significantly increased in APP/PS1 mice in comparison to vehicle-treated NTG mice. CP2 treatment further increased food intake in APP/PS1 mice. **c)** Metabolic rate was increased in APP/PS1 compared to NTG mice. CP2 treatment decreased metabolic rate in NTG mice but did not have an effect in APP/PS1 mice. **d,e)** CP2 treatment significantly increased fat mass in NTG mice with a similar trend in APP/PS1 mice compared to vehicle-treated counterparts. **f)** CP2 treatment significantly increased lean mass in NTG and APP/PS1 mice. **g,h)** CP2 treatment increased brown fat in NTG mice (**g**), with a trend towards increasing inguinal fat in both NTG and APP/PS1 mice (**h**). **i)** CP2 treatment did not affect subcutaneous fat mass in APP/PS1 or NTG mice. **j,k)** CP2 treatment significantly increased the percentage of peritoneal fat in APP/PS1 mice (**j**) with a similar trend for periovarian fat in APP/PS1 and NTG mice (**k**). **l)** CP2 treatment did not affect the percentage of mesenteric fat in both NTG and APP/PS1 mice. All mice were 23-month-old treated with CP2 for 13 - 14 months. Significant changes were determined by two-way ANOVA with Fisher's LSD *post-hoc* test. Data are mean  $\pm$  S.E.M.; NTG,  $n = 16$  mice per group; NTG+CP2,  $n = 20$  mice per group; APP/PS1,  $n = 15$  mice per group; APP/PS1+CP2,  $n = 19$  mice per group. \* $P < 0.05$ , \*\* $P < 0.01$ , \*\*\* $P < 0.001$ .

a)

|                  | Dose<br>mg kg <sup>-1</sup> | T(1/2)<br>h | Tmax<br>h | Cmax<br>ng ml <sup>-1</sup> | AUC(0-24 h)<br>ng ml <sup>-1</sup> *h | AUC(0-inf)<br>ng ml <sup>-1</sup> *h | Cl/F<br>ml h <sup>-1</sup> kg <sup>-1</sup> | F (%) |
|------------------|-----------------------------|-------------|-----------|-----------------------------|---------------------------------------|--------------------------------------|---------------------------------------------|-------|
| IV <sub>pl</sub> | 3                           | 6.03        | 0.08      | 4863.00                     | 3655                                  | 3655                                 | 821                                         | 100   |
| PO <sub>pl</sub> | 25                          | 2.09        | 1.01      | 4512.00                     | 19777                                 | 19785                                | 1264                                        | 64.96 |

b)

| Time (h) | CP2 [ng ml <sup>-1</sup> ]<br>from IV |
|----------|---------------------------------------|
| 0.08     | 2009.60                               |
| 0.08     | 2054.70                               |
| 0.08     | 6683.70                               |
| 0.25     | 2458.40                               |
| 0.25     | 5557.70                               |
| 0.27     | 3952.2                                |
| 0.50     | 2549.5                                |
| 0.50     | 2630.6                                |
| 0.50     | 2436.8                                |
| 1.00     | 809.8                                 |
| 1.00     | 767                                   |
| 1.02     | 767.8                                 |
| 2.08     | 403.8                                 |
| 2.03     | 411.8                                 |
| 2.00     | 231.4                                 |
| 2.02     | 235.5                                 |
| 4.00     | 42.402                                |
| 4.00     | 47.161                                |
| 4.00     | 35.961                                |
| 8.00     | 3.342                                 |
| 8.00     | 3.034                                 |
| 8.00     | 4.616                                 |
| 24.00    | 0.682                                 |
| 24.00    | 0.549                                 |
| 24.00    | 0.517                                 |

c)

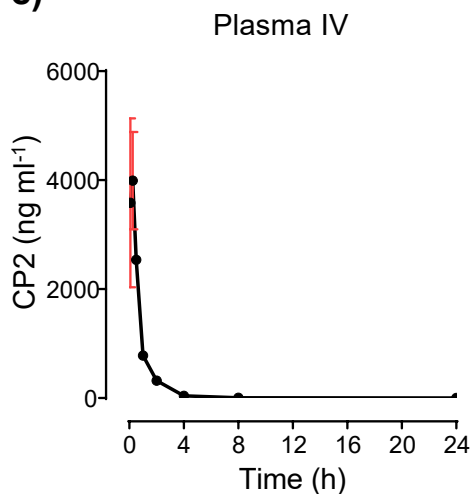

e)

| Time (h) | Plasma<br>[ng ml <sup>-1</sup> ] from<br>PO |
|----------|---------------------------------------------|
| 0.25     | 32.22                                       |
| 0.25     | 34.62                                       |
| 0.25     | 21.85                                       |
| 0.50     | 25.82                                       |
| 0.50     | 25.85                                       |
| 0.50     | 26.25                                       |
| 1.00     | 5026.3                                      |
| 1.00     | 4553.6                                      |
| 1.02     | 3956.1                                      |
| 1.98     | 3923.4                                      |
| 2.00     | 5388.2                                      |
| 2.00     | 3681.7                                      |
| 4.00     | 1108.6                                      |
| 4.02     | 1090.3                                      |
| 4.00     | 2351.5                                      |
| 6.05     | 883.8                                       |
| 6.00     | 878.1                                       |
| 5.98     | 1426.8                                      |
| 8.00     | 360.5                                       |
| 7.98     | 769.1                                       |
| 8.00     | 439.2                                       |
| 24.00    | 2.62                                        |
| 24.00    | 2.41                                        |
| 24.00    | 3.05                                        |

d)

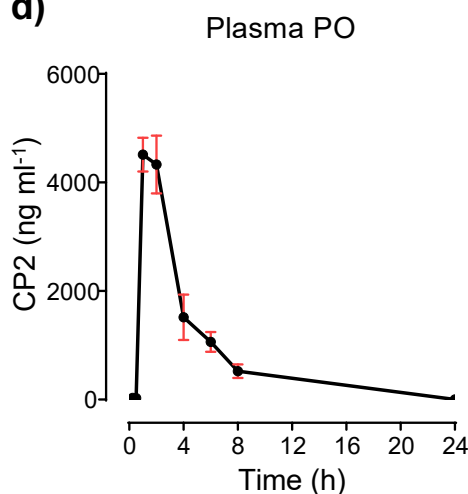

**Supplementary Figure 4. Pharmacokinetics (PK) of CP2 delivered via oral (PO) or intravenous (IV) administration.** a) Summary of PK study of CP2 delivered to C57BL/6 female mice ( $n = 3$  per time point) via IV route (3 mg/kg) or via gavage (PO route) (25 mg/kg). The maximal plasma concentration following PO route was 4,512 ng/ml. The T1/2 values following drug administration in plasma were around 6 h and 2 h for IV and PO, respectively. The bioavailability (F) was estimated at 65 %. AUC, areas under the curve. b,c) CP2 levels in plasma after the IV administration (3 mg/kg). d,e) CP2 levels in plasma after the PO administration (25 mg/kg via gavage). Tmax, time to reach maximum (peak) plasma concentration following drug administration; Cmax, maximum (peak) plasma drug concentration; AUC (0-24 h), area under the plasma concentration-time curve over the last 24 h dosing interval; AUC (0-inf), area under the plasma concentration-time curve to infinity represents the total drug exposure across time; Cl/F, apparent total clearance of the drug from plasma after oral administration.



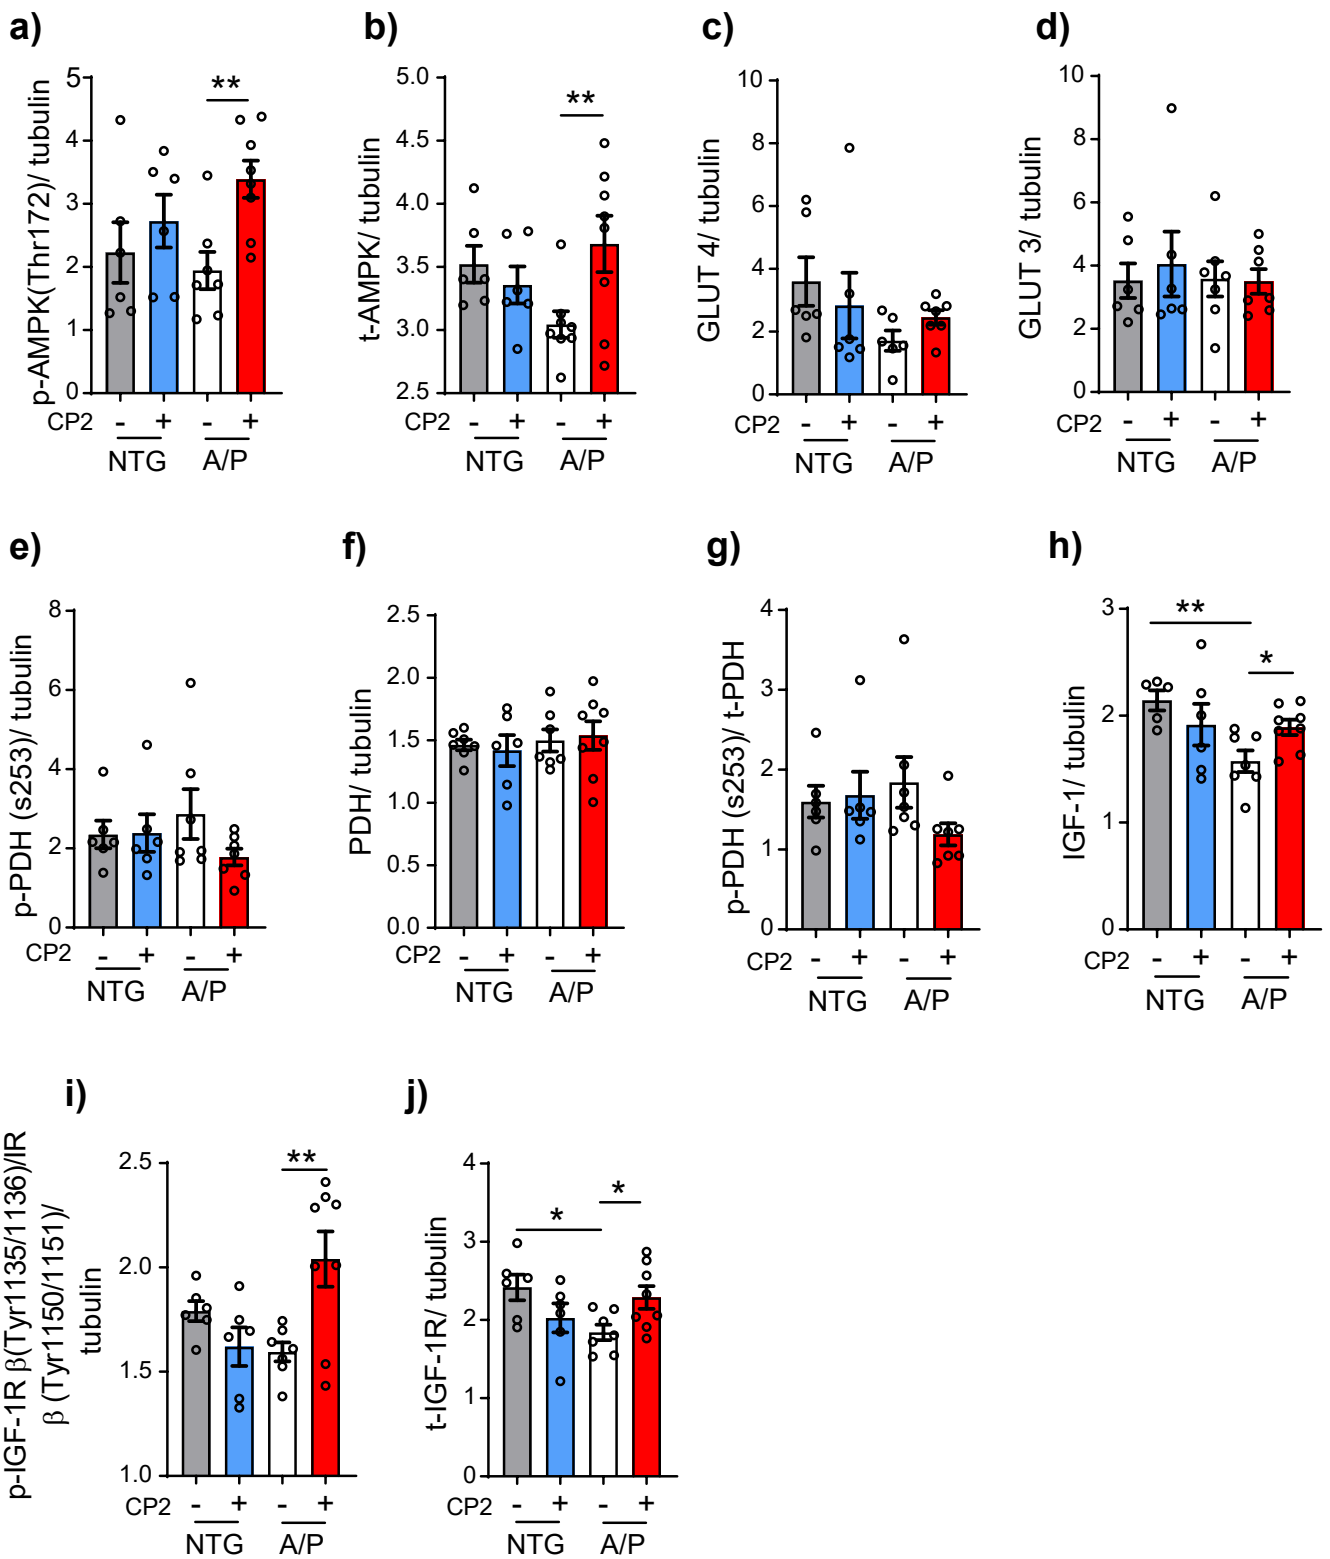

**Supplementary Figure 5. CP2 treatment improves glucose uptake and utilization in APP/PS1 mice. a-j)** The quantification of protein levels relevant to the IGF-1 signaling pathway in the brain tissue of CP2- and vehicle-treated APP/PS1 and NTG mice after 13 - 14 months of treatment using Western blot assay. Significance was determined by two-way ANOVA with Fisher's LSD *post-hoc* test. Data are presented as mean  $\pm$  S.E.M. \* $P < 0.05$ ; \*\* $P < 0.01$ ; NTG,  $n = 6$  mice *per* group; NTG+CP2,  $n = 6$  mice *per* group; APP/PS1,  $n = 8$  mice *per* group; APP/PS1+CP2,  $n = 8$  mice *per* group.

# Western blots for Fig. 3i

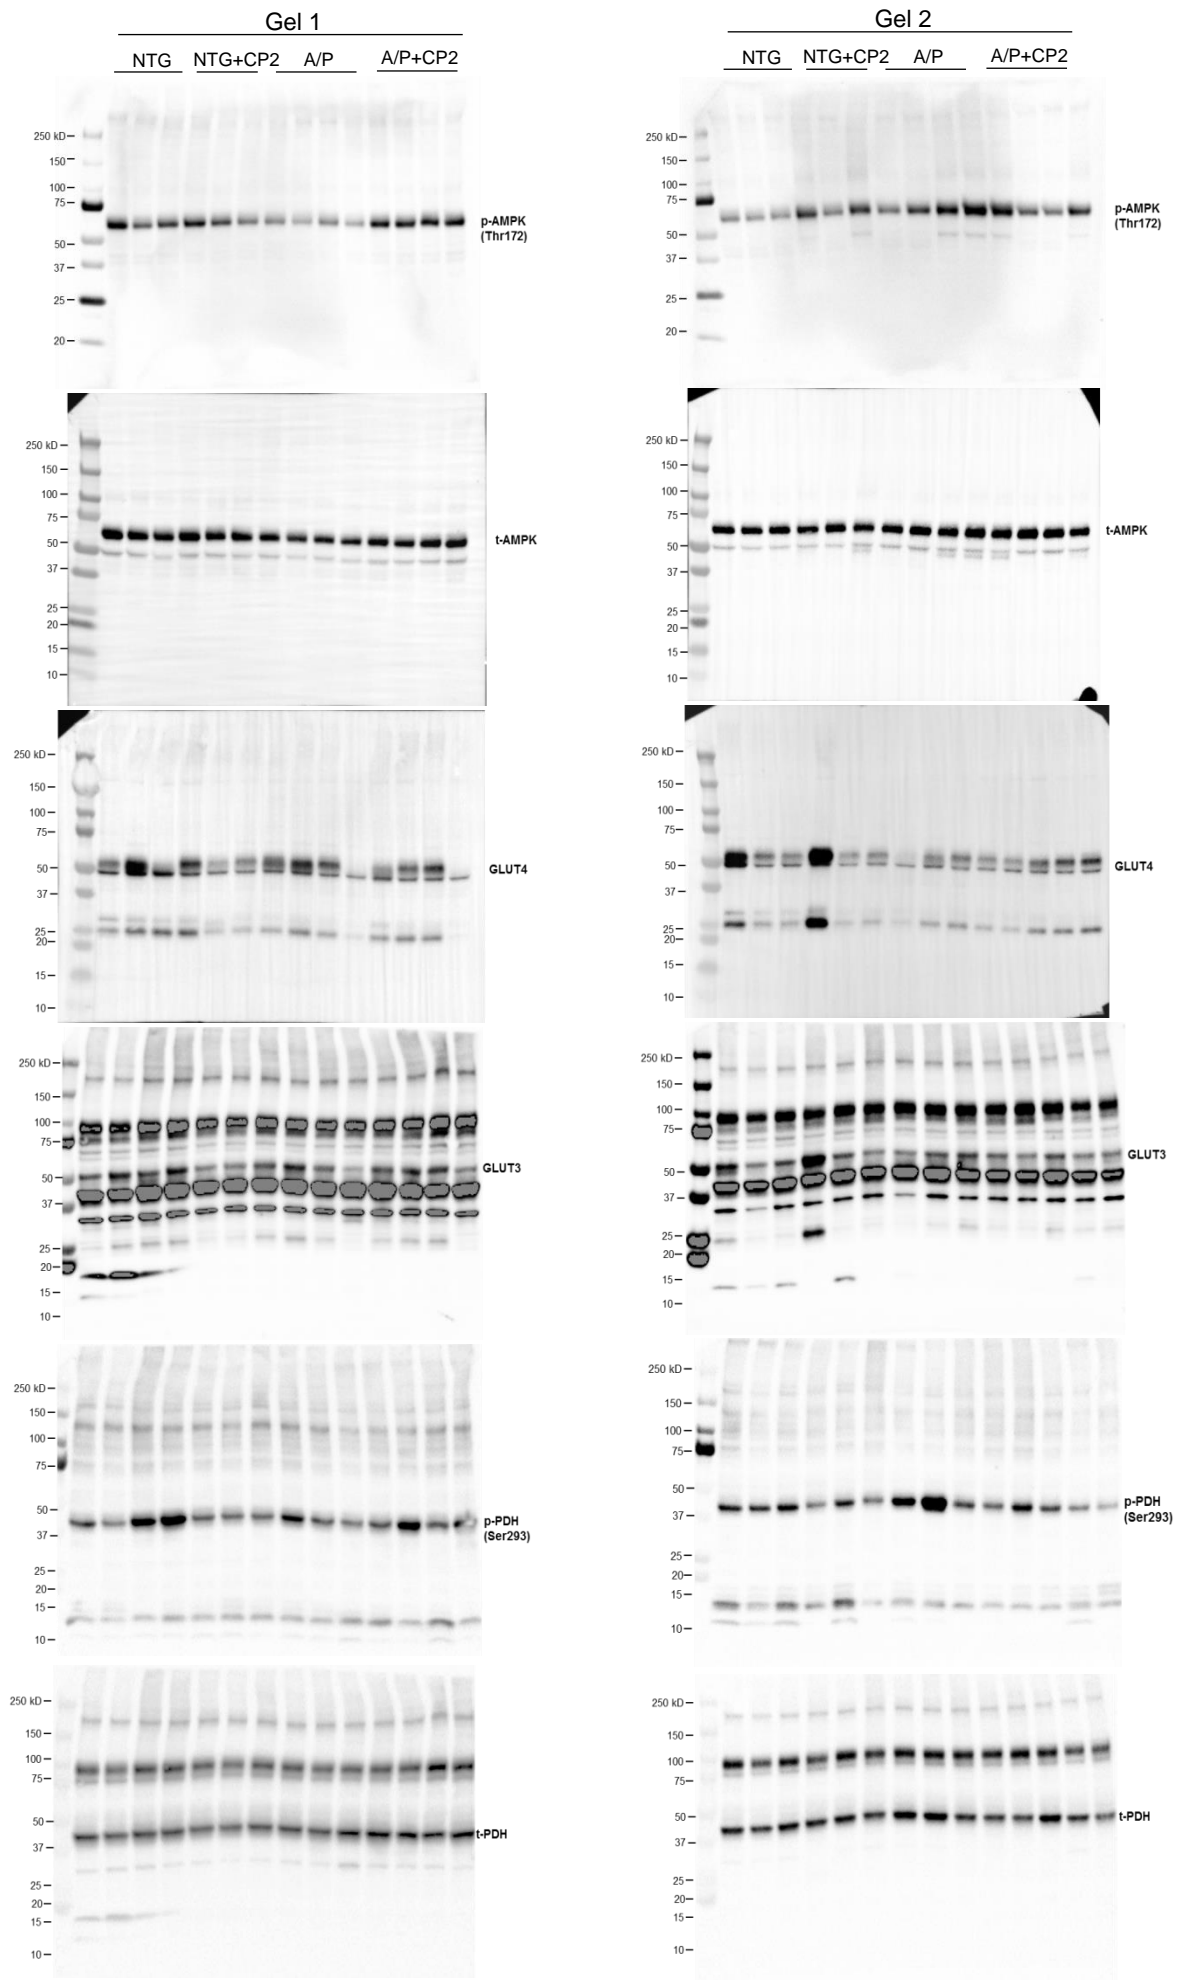

# Western blots for Fig. 3i

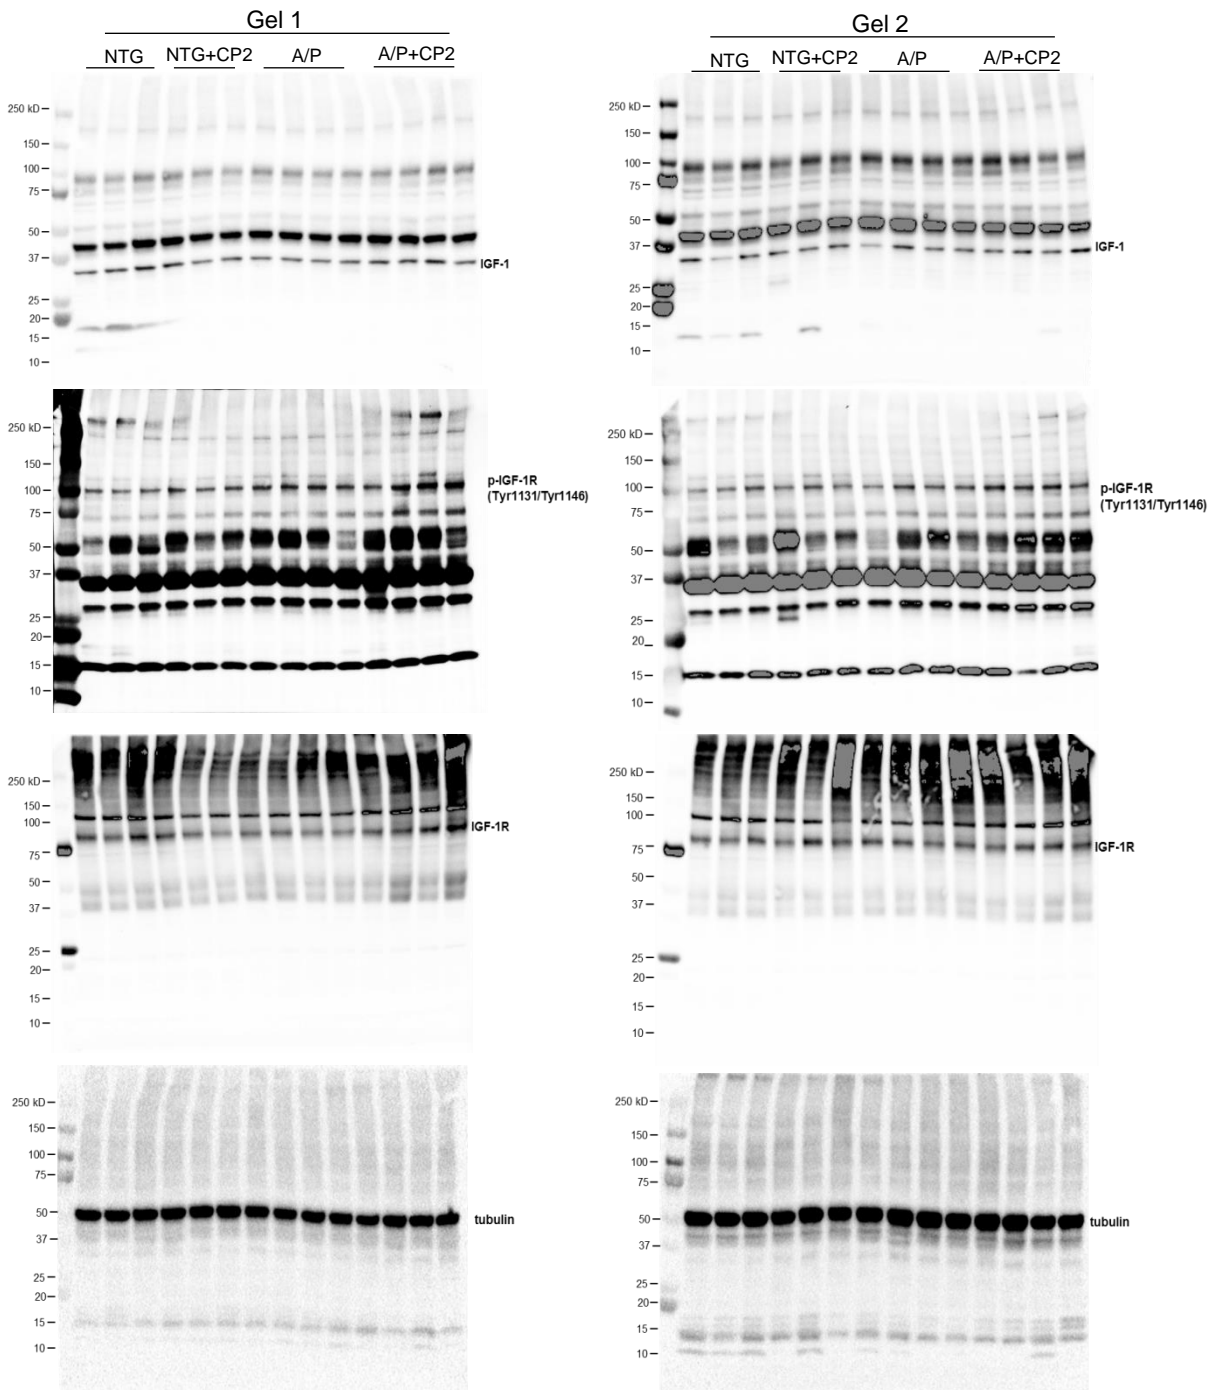

**Supplementary Figure 6. Original uncropped Western blot images for Figure 3i.** Cortico-hippocampal region of 6 - 8 mice *per* group was taken for Western blot analysis (NTG,  $n = 6$ ; NTG+CP2,  $n = 6$ ; APP/PS1,  $n = 8$ ; APP/PS1+CP2,  $n = 8$ ).

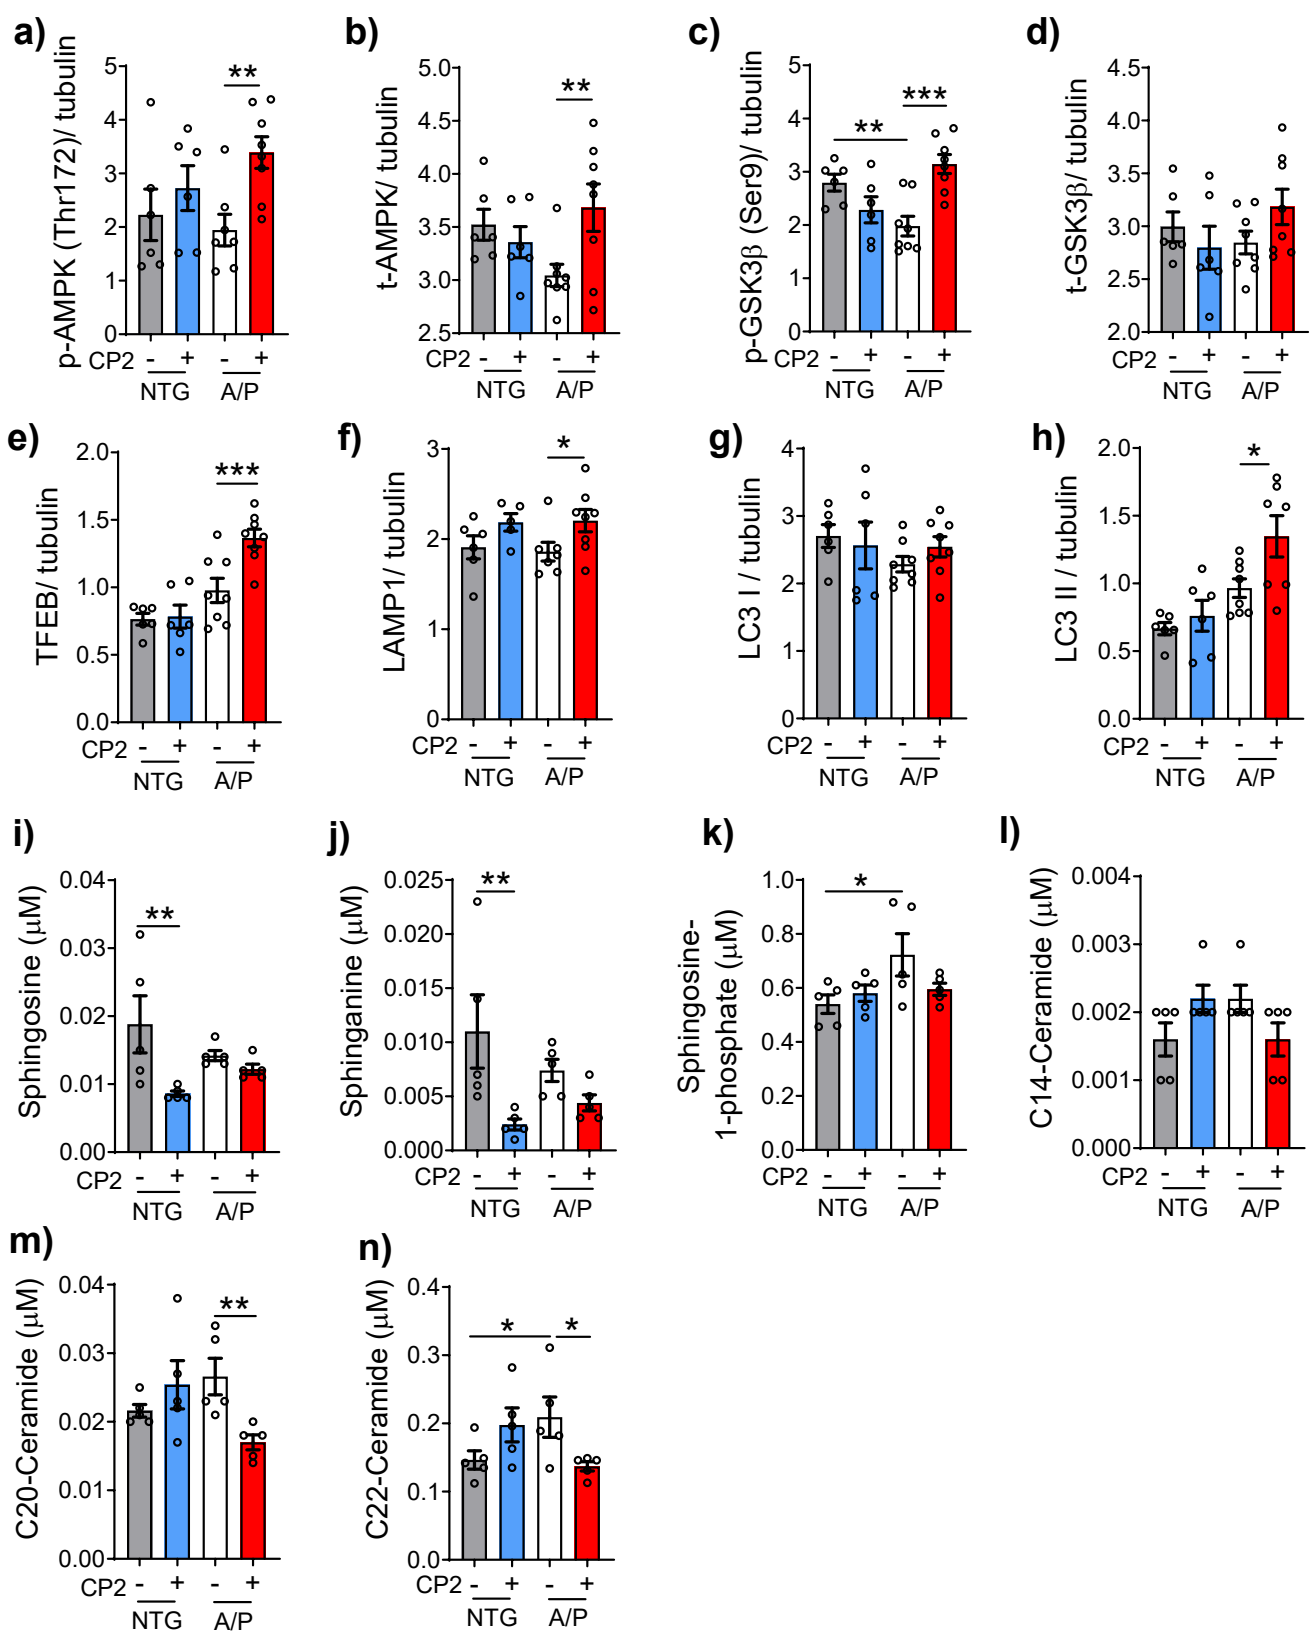

**Supplementary Figure 7. CP2 treatment induces autophagy in the brain and reduces levels of plasma ceramides in symptomatic APP/PS1 mice.** **a-h)** CP2-dependent activation of AMPK and inhibition of GSK3β activates TFEB and increases autophagy in CP2-treated APP/PS1 mice. Quantification of Western blot assays performed in the brain tissue of 23-month-old NTG and APP/PS1 mice treated with vehicle or CP2. NTG,  $n = 6$  mice *per* group; NTG+CP2,  $n = 6$  mice *per* group; APP/PS1,  $n = 8$  mice *per* group; APP/PS1+CP2,  $n = 8$  mice *per* group. **i-n)** Plasma from vehicle- and CP2-treated NTG and APP/PS1 mice 23-month-old ( $n = 5$  *per* group) was obtained via retro-orbital bleeding. Ceramide concentrations were determined using targeted metabolomics approach and electrospray ionization mass spectrometry ESI/MS. Significance was determined by two-way ANOVA with Fisher's LSD *post-hoc* test. Data are presented as mean  $\pm$  S.E.M. \* $P < 0.05$ ; \*\* $P < 0.01$ ; \*\*\* $P < 0.001$ .

# Western blots for Fig. 4g

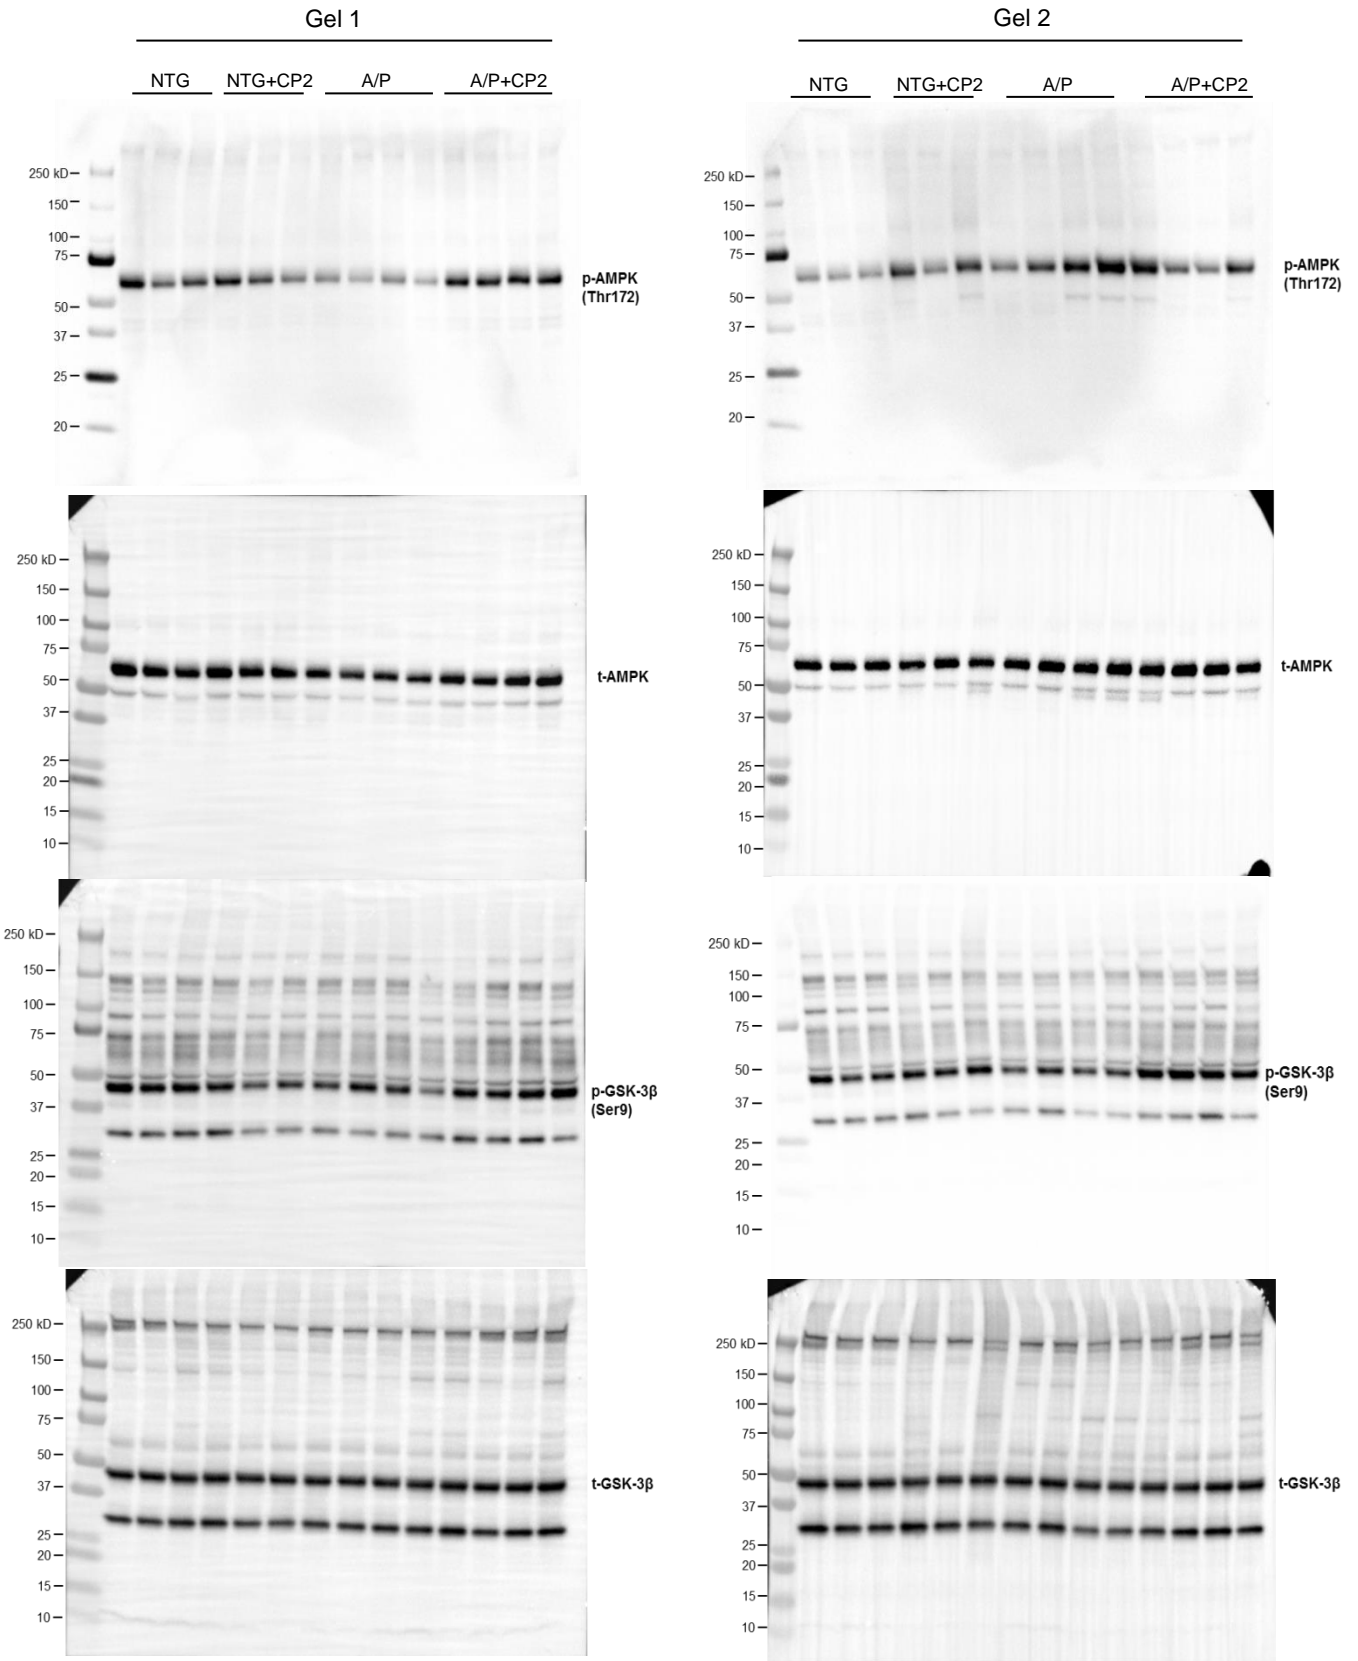

# Western blots for Fig. 4g

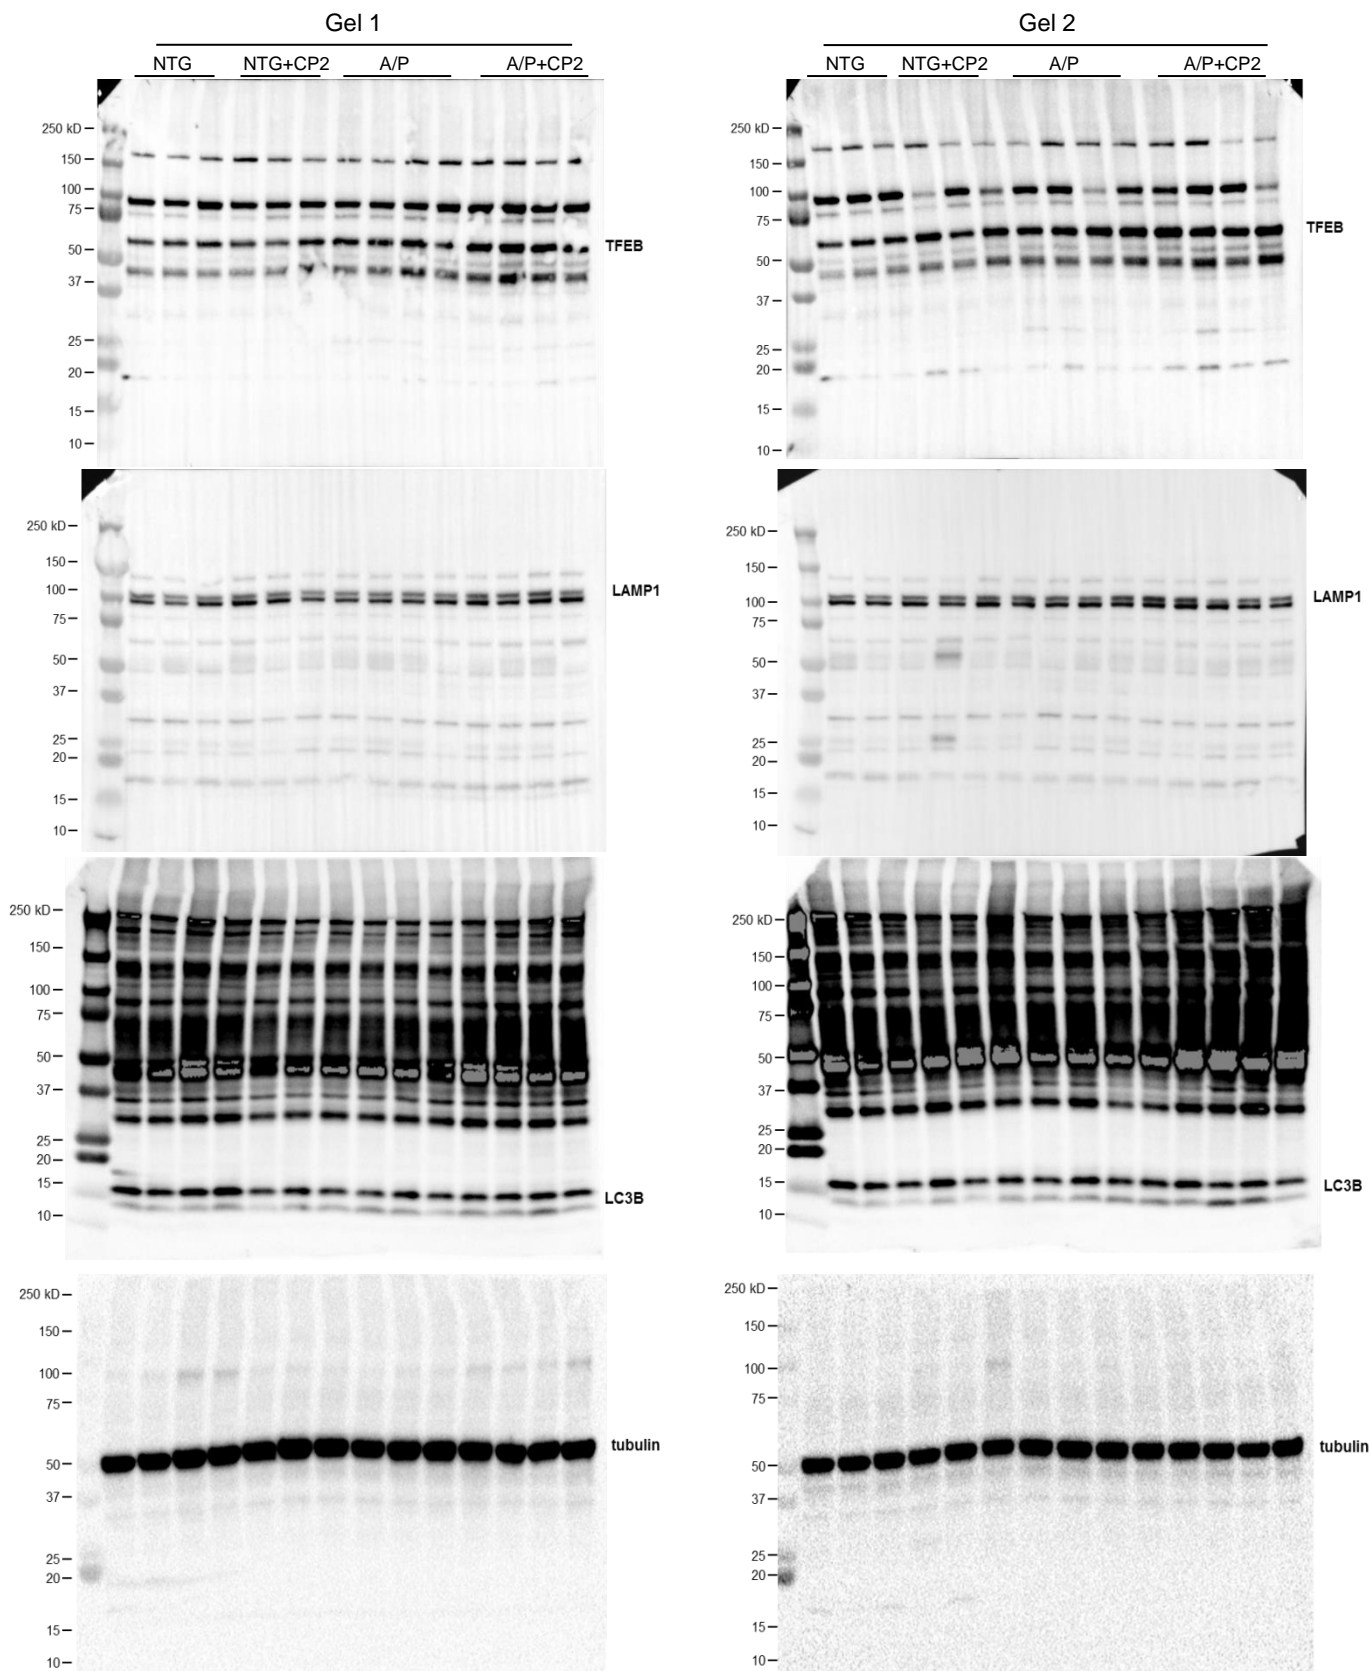

**Supplementary Figure 8. Original uncropped Western blot images for Figure 4g.** Cortico-hippocampal region of 6 - 8 mice *per* group was taken for Western blot analysis (NTG,  $n = 6$ ; NTG+CP2,  $n = 6$ ; APP/PS1,  $n = 8$ ; APP/PS1 +CP2,  $n = 8$ ).

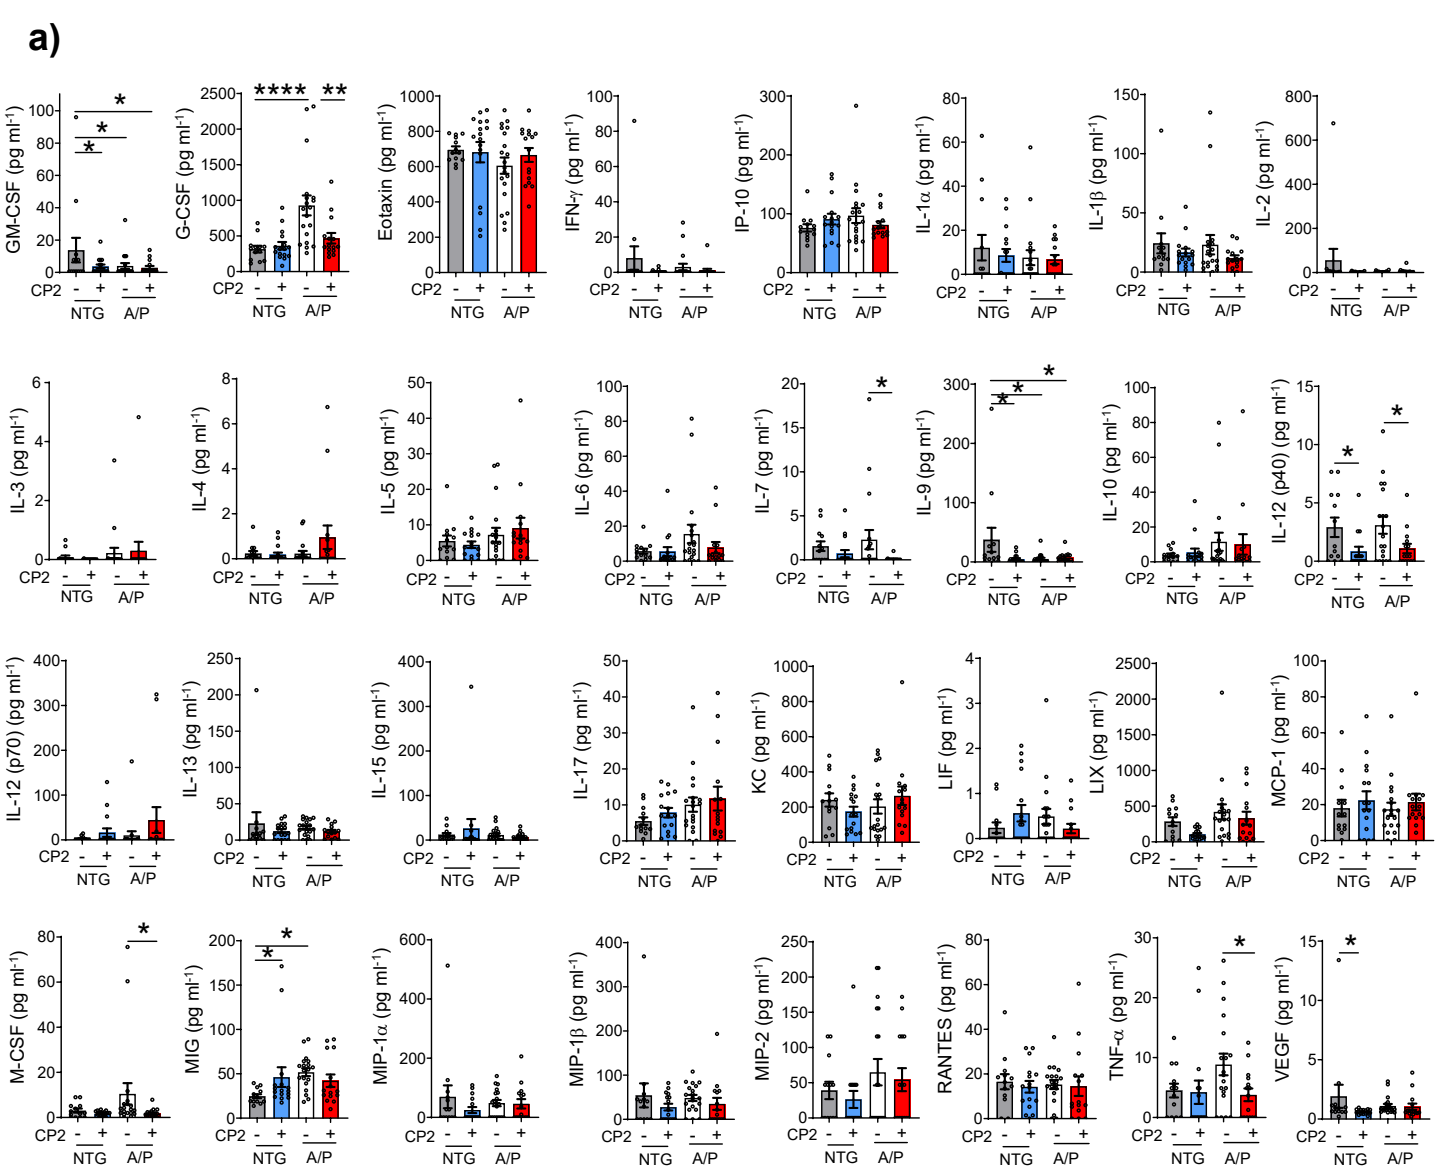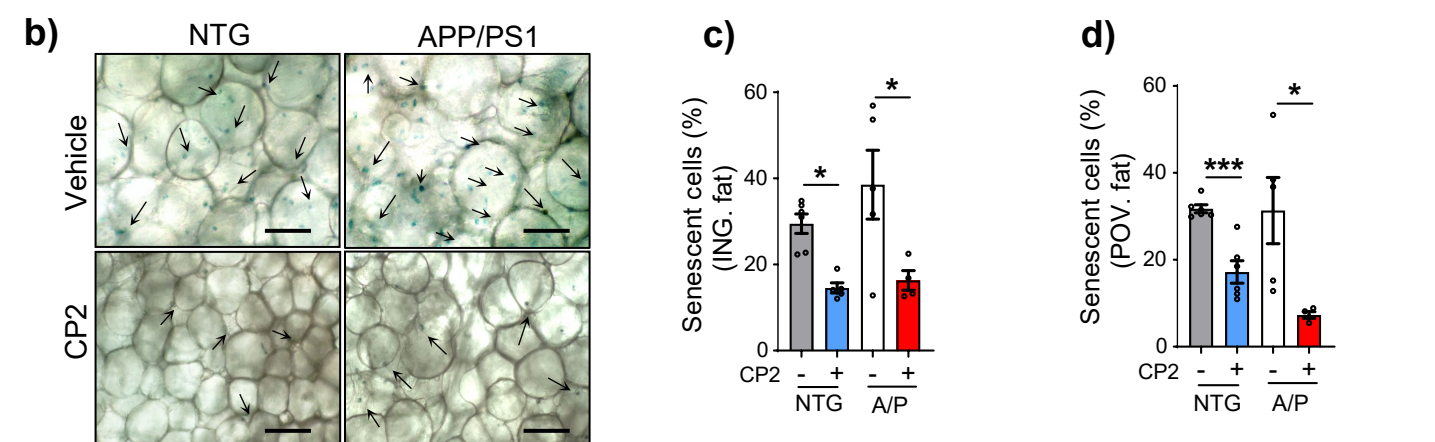

**Supplementary Figure 9. CP2 treatment reduces inflammatory markers in blood and level of senescence cells in adipose tissue of symptomatic APP/PS1 and NTG mice.** **a)** A panel of 32 cytokines and chemokines measured in plasma from 23-month-old symptomatic APP/PS1 and NTG vehicle- and CP2- treated mice. NTG,  $n = 13$  mice *per* group; NTG+CP2,  $n = 17$  mice *per* group; APP/PS1,  $n = 20$  mice *per* group; APP/PS1+CP2,  $n = 16$  mice *per* group. Plasma was obtained via retro-orbital bleeding; ELISA was conducted by Eve Technologies. **b)** Representative images of  $\beta$ -Gal staining of senescence cells in periovarian (POV) and inguinal (ING) adipose tissue from 23-month-old vehicle and CP2-treated NTG and APP/PS1 mice. Scale bar, 100  $\mu$ m. **c,d)** Quantification of  $\beta$ -Gal staining in ING (**c**) and POV (**d**) fat depots from (**b**). NTG,  $n = 6$  mice *per* group; NTG+CP2,  $n = 6$  mice *per* group; APP/PS1,  $n = 5$  mice *per* group; APP/PS1+CP2,  $n = 4$  mice *per* group. A two-way ANOVA with Fisher's LSD *post-hoc* test was used for statistical analysis. Data are presented as mean  $\pm$  S.E.M. \* $P < 0.05$ ; \*\* $P < 0.01$ ; \*\*\* $P < 0.0001$ .

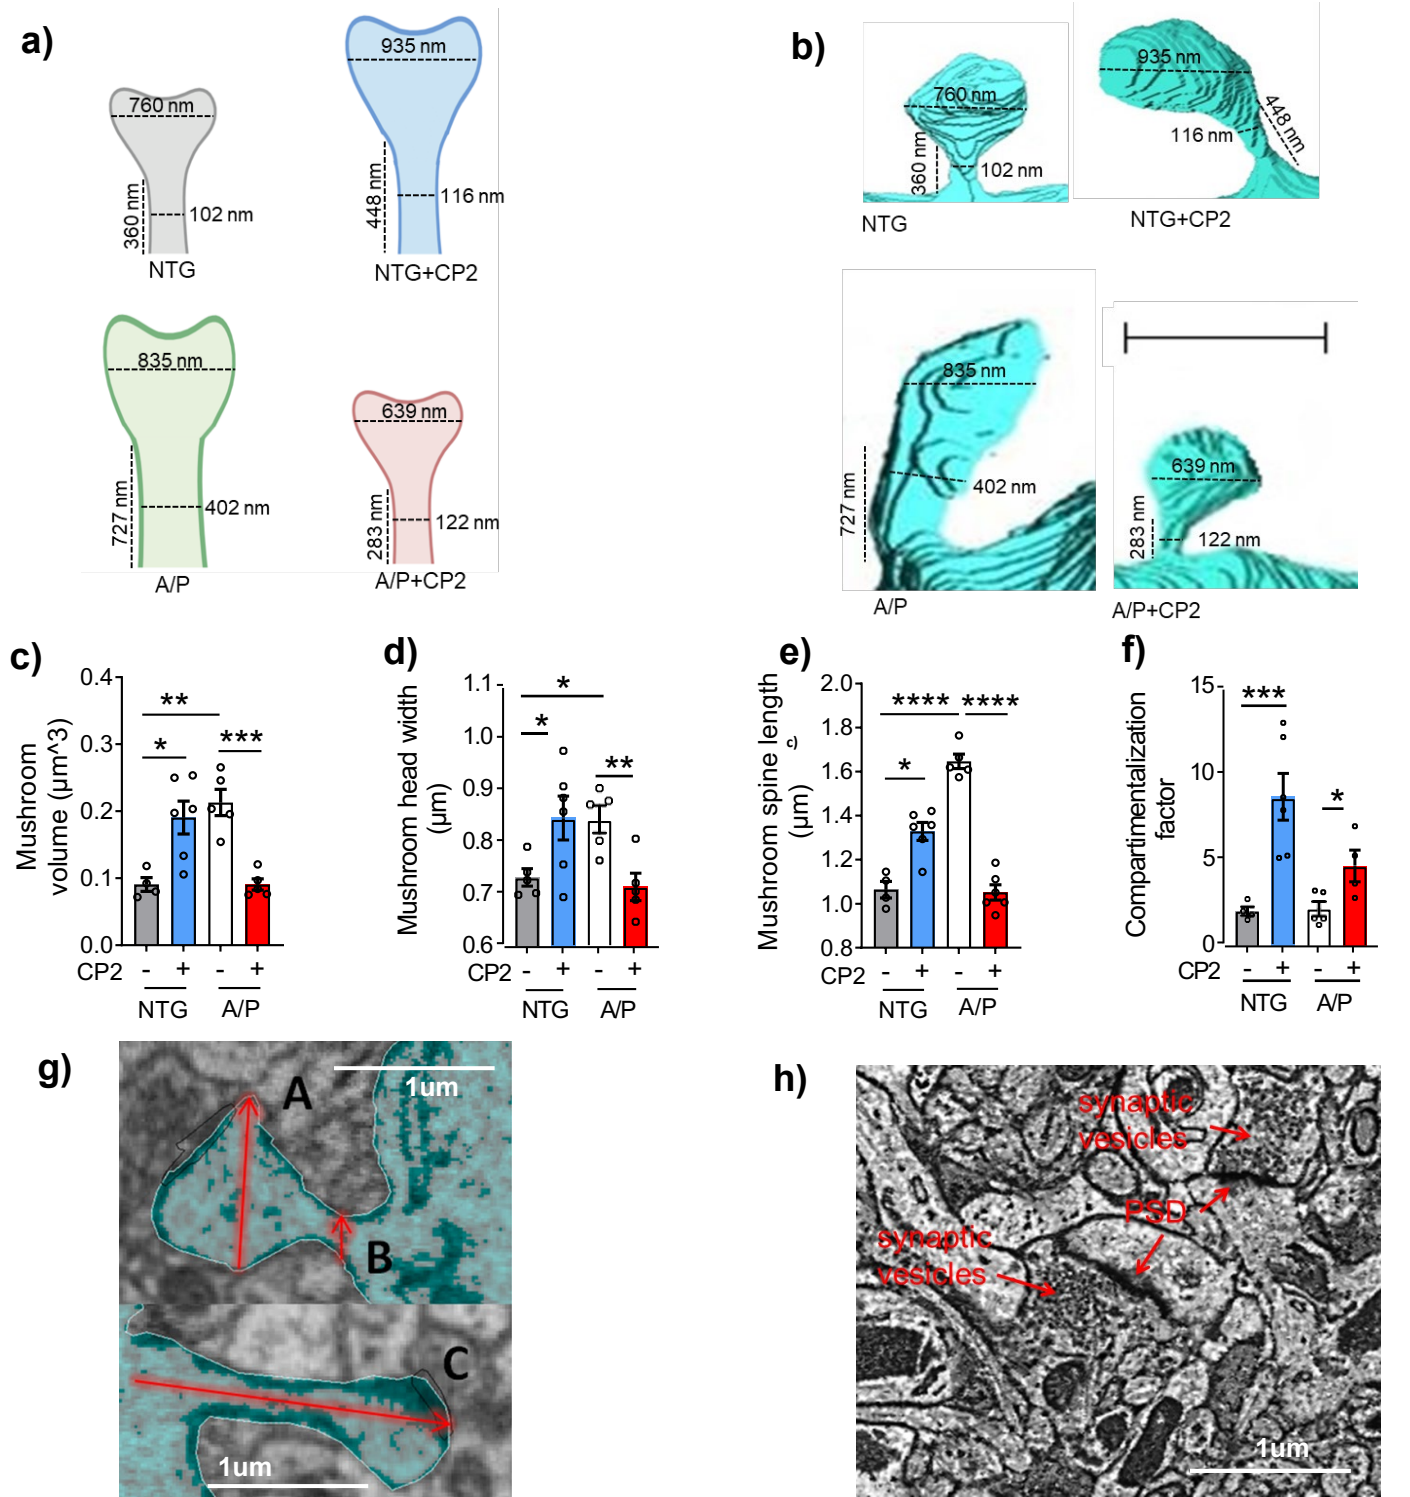

**Supplementary Figure 10. CP2 treatment improves the morphology of dendritic spines required for LTP formation and synaptic function.** **a)** Schematic illustration of morphological alterations in dendritic spines observed in CP2-treated NTG and APP/PS1 mice. Numbers indicate mean values. **b)** Representative images of mushroom spines generated using 3DEM from brain tissue of vehicle- and CP2-treated NTG and APP/PS1 mice. Scale bar, 1  $\mu\text{m}$ . APP/PS1 mice have larger spine heads and longer and wider spine necks, which is associated with reduced ability to maintain LTP. **c-e)** Multiple parameters of dendritic spine morphology depicted in **(a,b)** measured in vehicle- and CP2-treated NTG and APP/PS1 mice including the volume of mushroom spines **(c)**; mushroom head width **(d)**; and mushroom spine length **(e)**. Increased spine maturation after CP2 treatment is supported by measurements of the overall spine volume and spine geometry, especially the length and the width of the neck and the head, which are essential parameters influencing the ability of spines to retain synaptic receptors. **f)** The compartmentalization factor (CF), a measure of biochemical compartmentalization of spine synapses (see definition in the Method), calculated for each mushroom spine in vehicle vs. CP2-treated NTG and APP/PS1 mice. Significant increase in CF in CP2-treated mice indicates stronger ability to maintain LTP. **g)** Example of measurements of head diameter (A), neck width (B), and spine length from base to head (C). **h)** Representative EM micrograph of the CA1 hippocampal region utilized in the calculation of active synapses. Identification of synapses was done based on the presence of postsynaptic density (PSD) and synaptic vesicles. Scale bar, 1  $\mu\text{m}$ . Data are presented as mean  $\pm$  S.E.M. A two-way ANOVA with Fisher's LSD post-hoc test was used for statistical analysis. Reconstructions were done in one mouse per group using 4 dendrites from NTG; 6 dendrites from NTG+CP2; 5 dendrites from APP/PS1, and 5 dendrites from APP/PS1+CP2 mice. For each dendrite, 3-26 spines were analyzed. Each dot represents the average value. \* $P < 0.05$ ; \*\* $P < 0.01$ ; \*\*\* $P < 0.001$ ; \*\*\*\* $P < 0.0001$ .



# Western blots for Fig. 6e

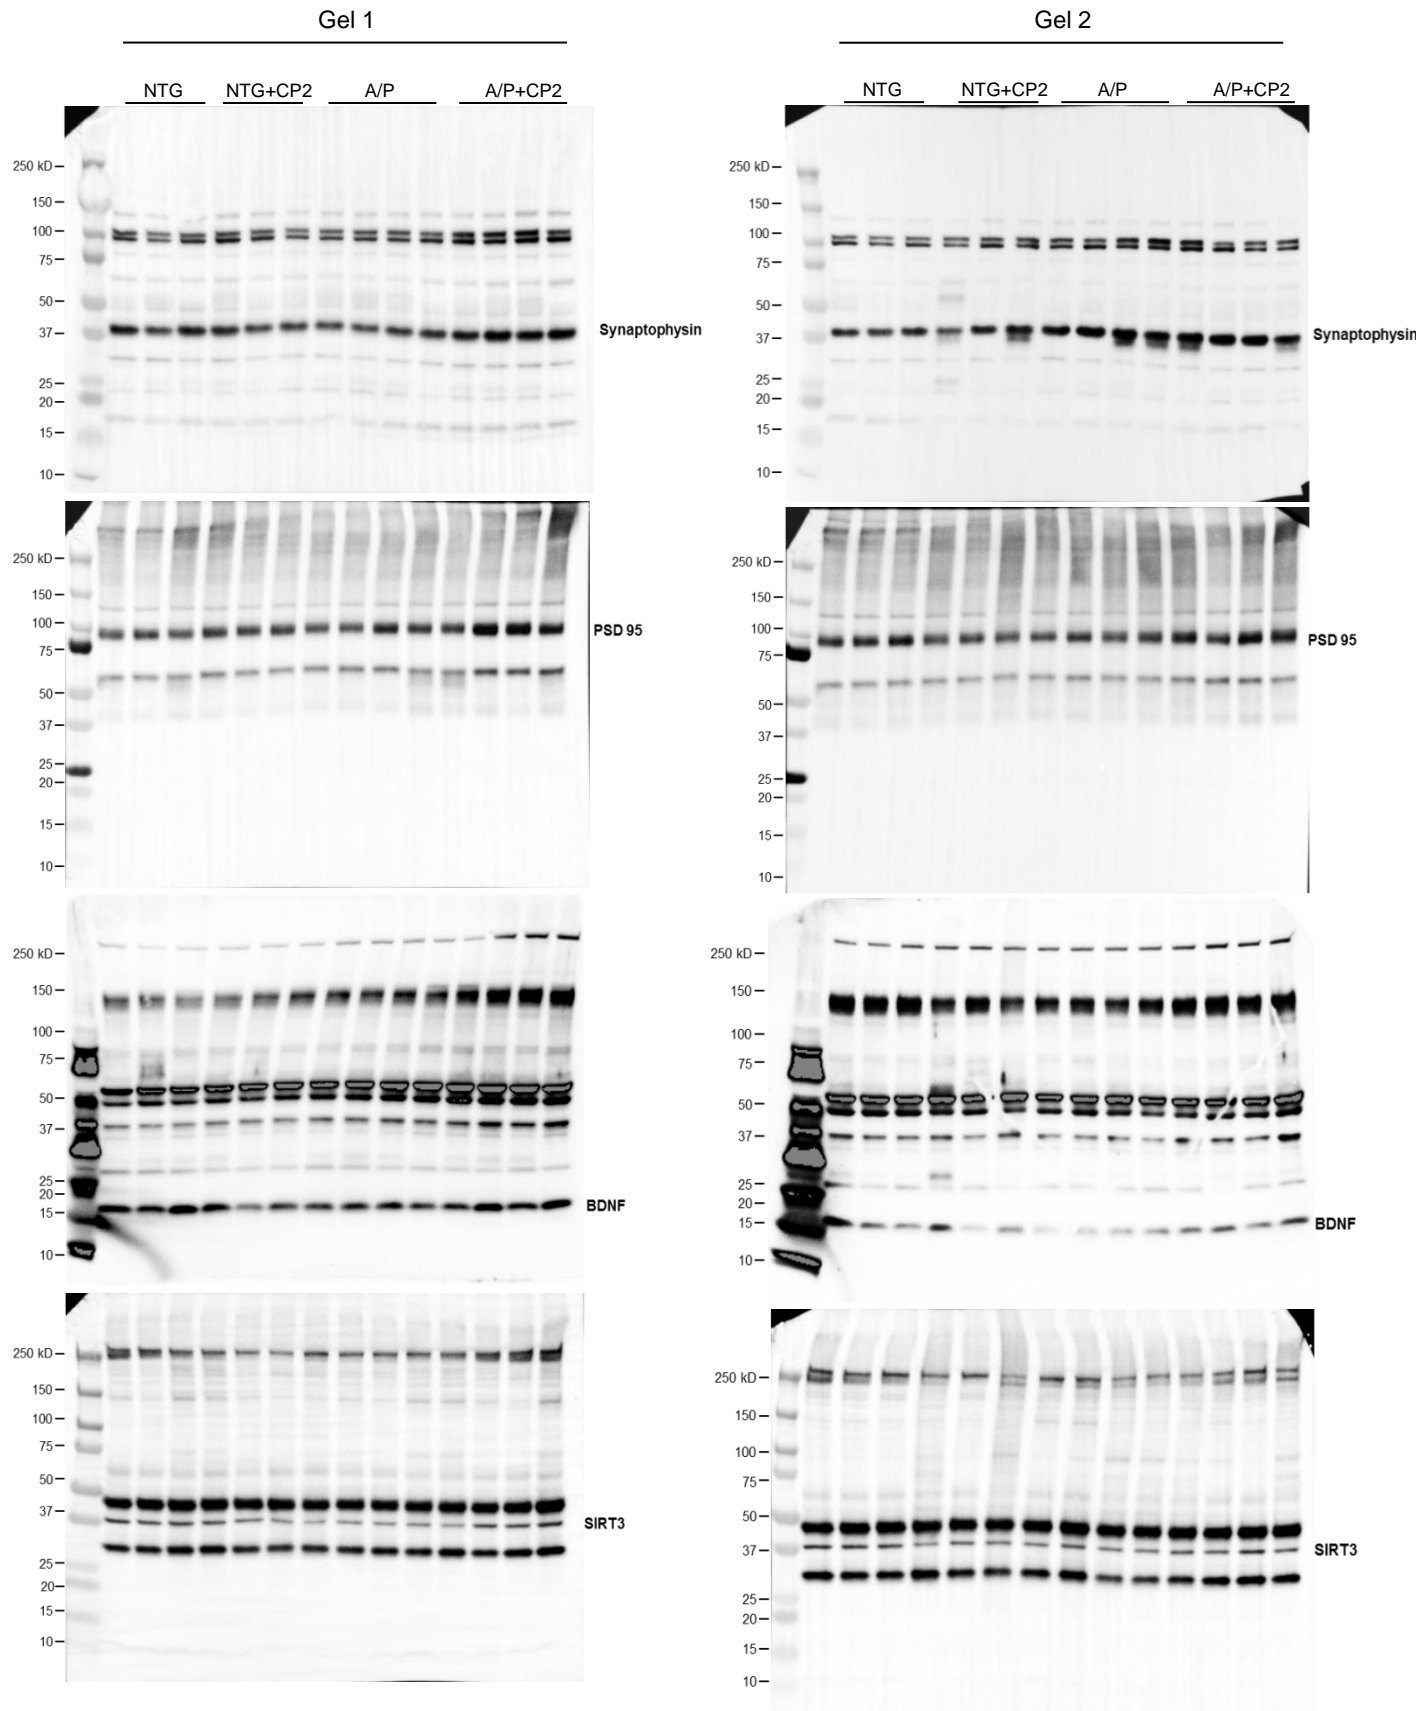

# Western blots for Fig. 6e

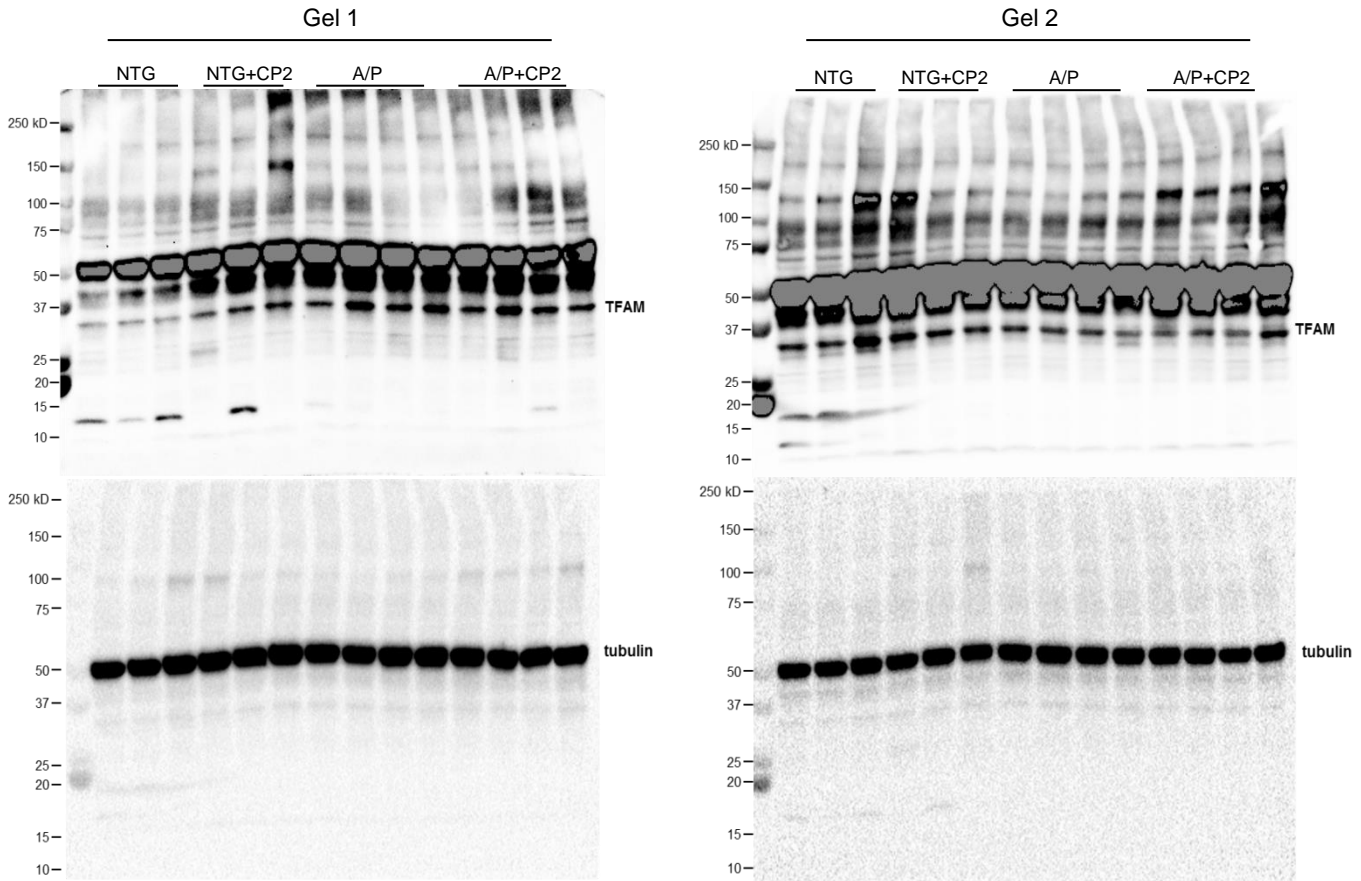

**Supplementary Figure 11. Original uncropped Western blot images for Figure 6k.** Cortico-hippocampal region of 6 - 8 mice *per* group was taken for Western blot analysis (NTG,  $n = 6$ ; NTG+CP2,  $n = 6$ ; APP/PS1,  $n = 8$ ; APP/PS1+CP2,  $n = 8$ ).

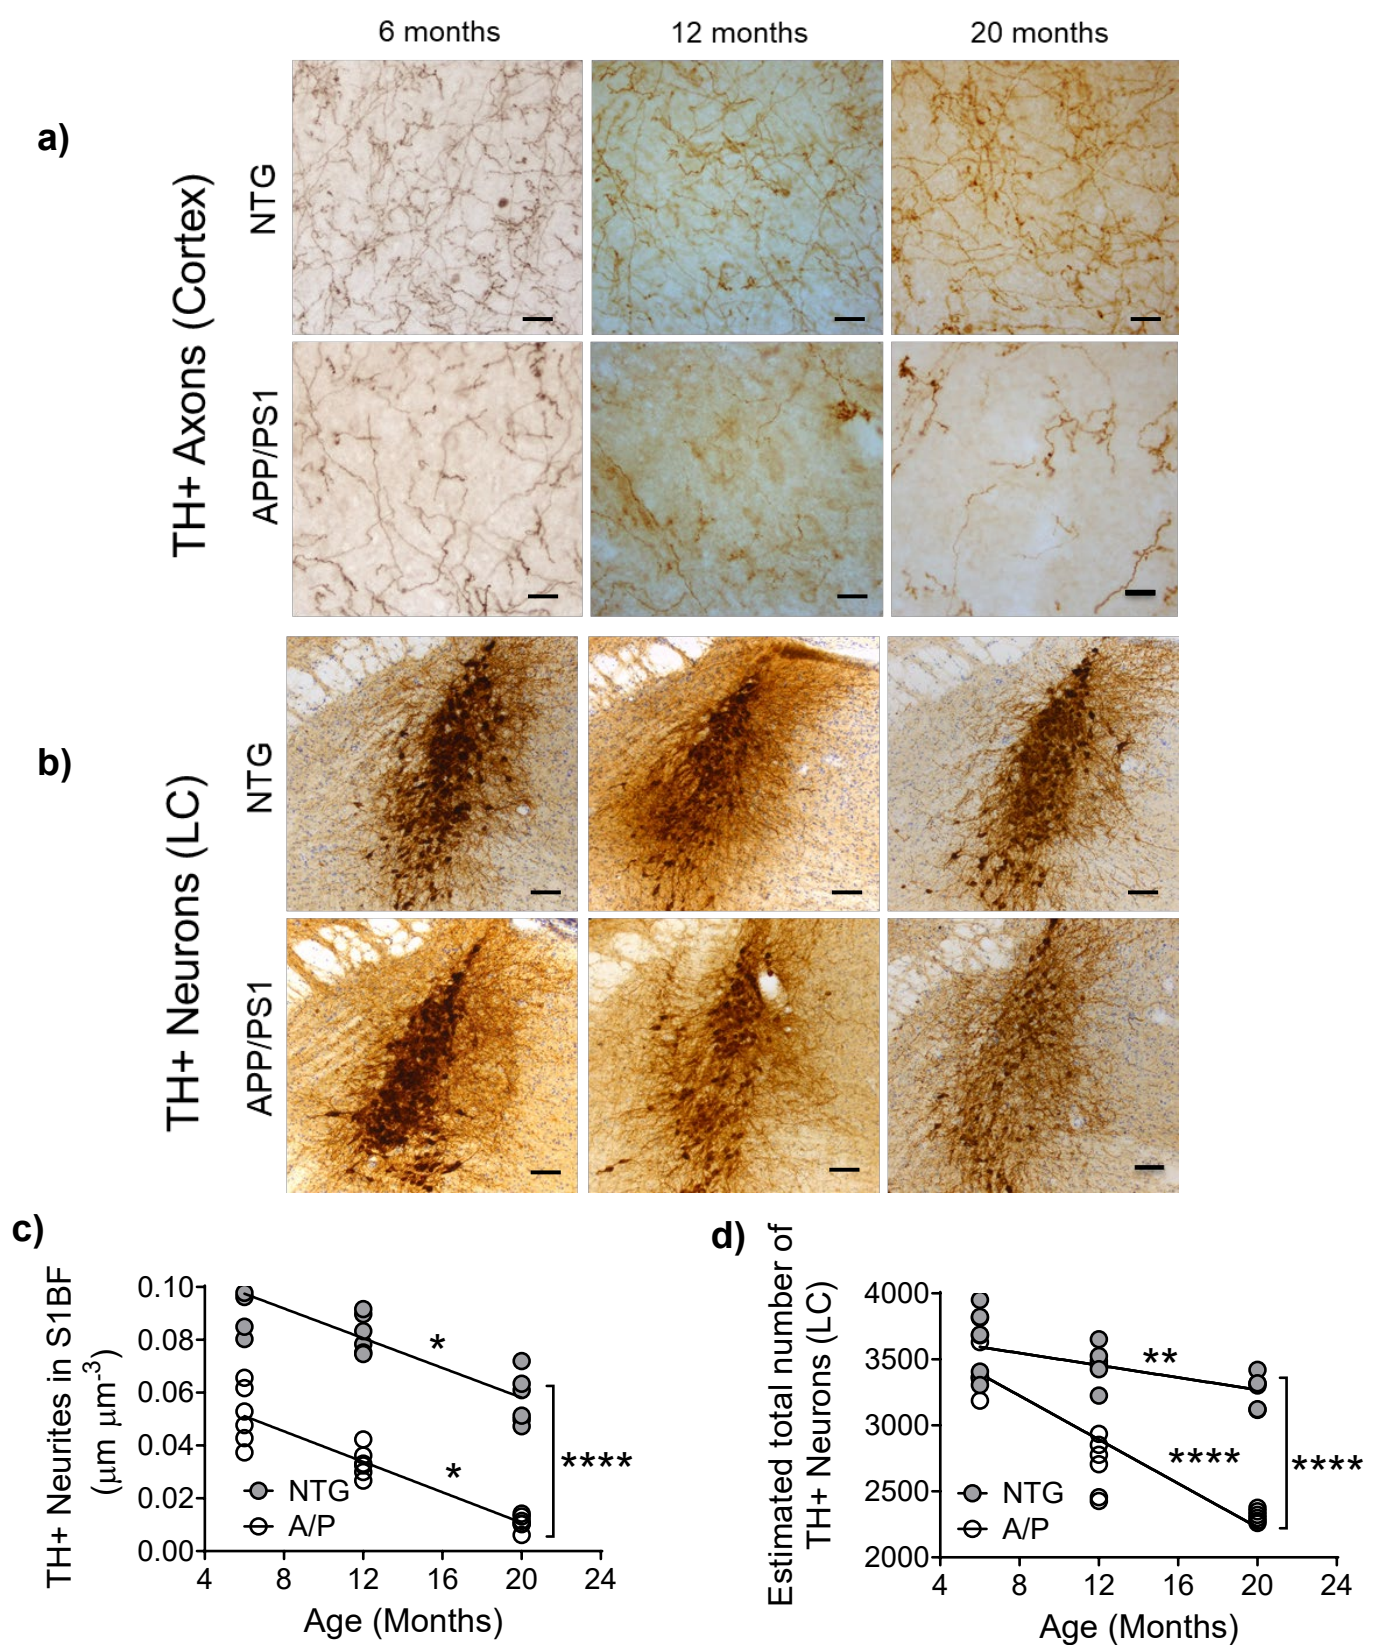

**Supplementary Figure 12. APP/PS1 mice display progressive neurodegeneration of TH+ neurons in cortex and locus coeruleus (LC).** NTG and APP/PS1 mice were evaluated for the integrity of TH+ axons in S1BF (a,c) and TH+ neurons in LC (b,d) at 6, 12, and 20 months of age. Representative images of TH+ axons in S1BF (a) and TH+ neurons in LC (b). **c)** Progressive loss of TH+ axons was observed in both APP/PS1 (R squared = 0.9997,  $P = 0.0102$ ) and NTG mice (R squared = 0.9952,  $P = 0.0442$ ). The rate of age-related decline of TH+ axons was similar between NTG and APP/PS1 (differences between slopes are not significant  $P = 0.7226$ ), but magnitude of TH+ axonal loss was greater in APP/PS1 mice (differences between the slopes elevation are significant  $P < 0.0001$ ). **d)** The age-related loss of TH+ neurons was observed starting from 6 months of age in both NTG (R squared = 0.3733,  $P = 0.0071$ ) and APP/PS1 mice (R squared = 0.8231,  $P < 0.0001$ ), and additionally APP/PS1 mice showed greater age-related loss of TH+ neurons ( $P < 0.0001$ ).  $n = 6$  female mice *per* group in each test. Data are represented as mean  $\pm$  S.E.M. A linear regression analysis was applied for statistical comparison between the groups. \*\* $P < 0.01$ , \*\*\* $P < 0.001$ , \*\*\*\* $P < 0.0001$ . Scale bars: a, 20  $\mu\text{m}$ ; b, 100  $\mu\text{m}$ .

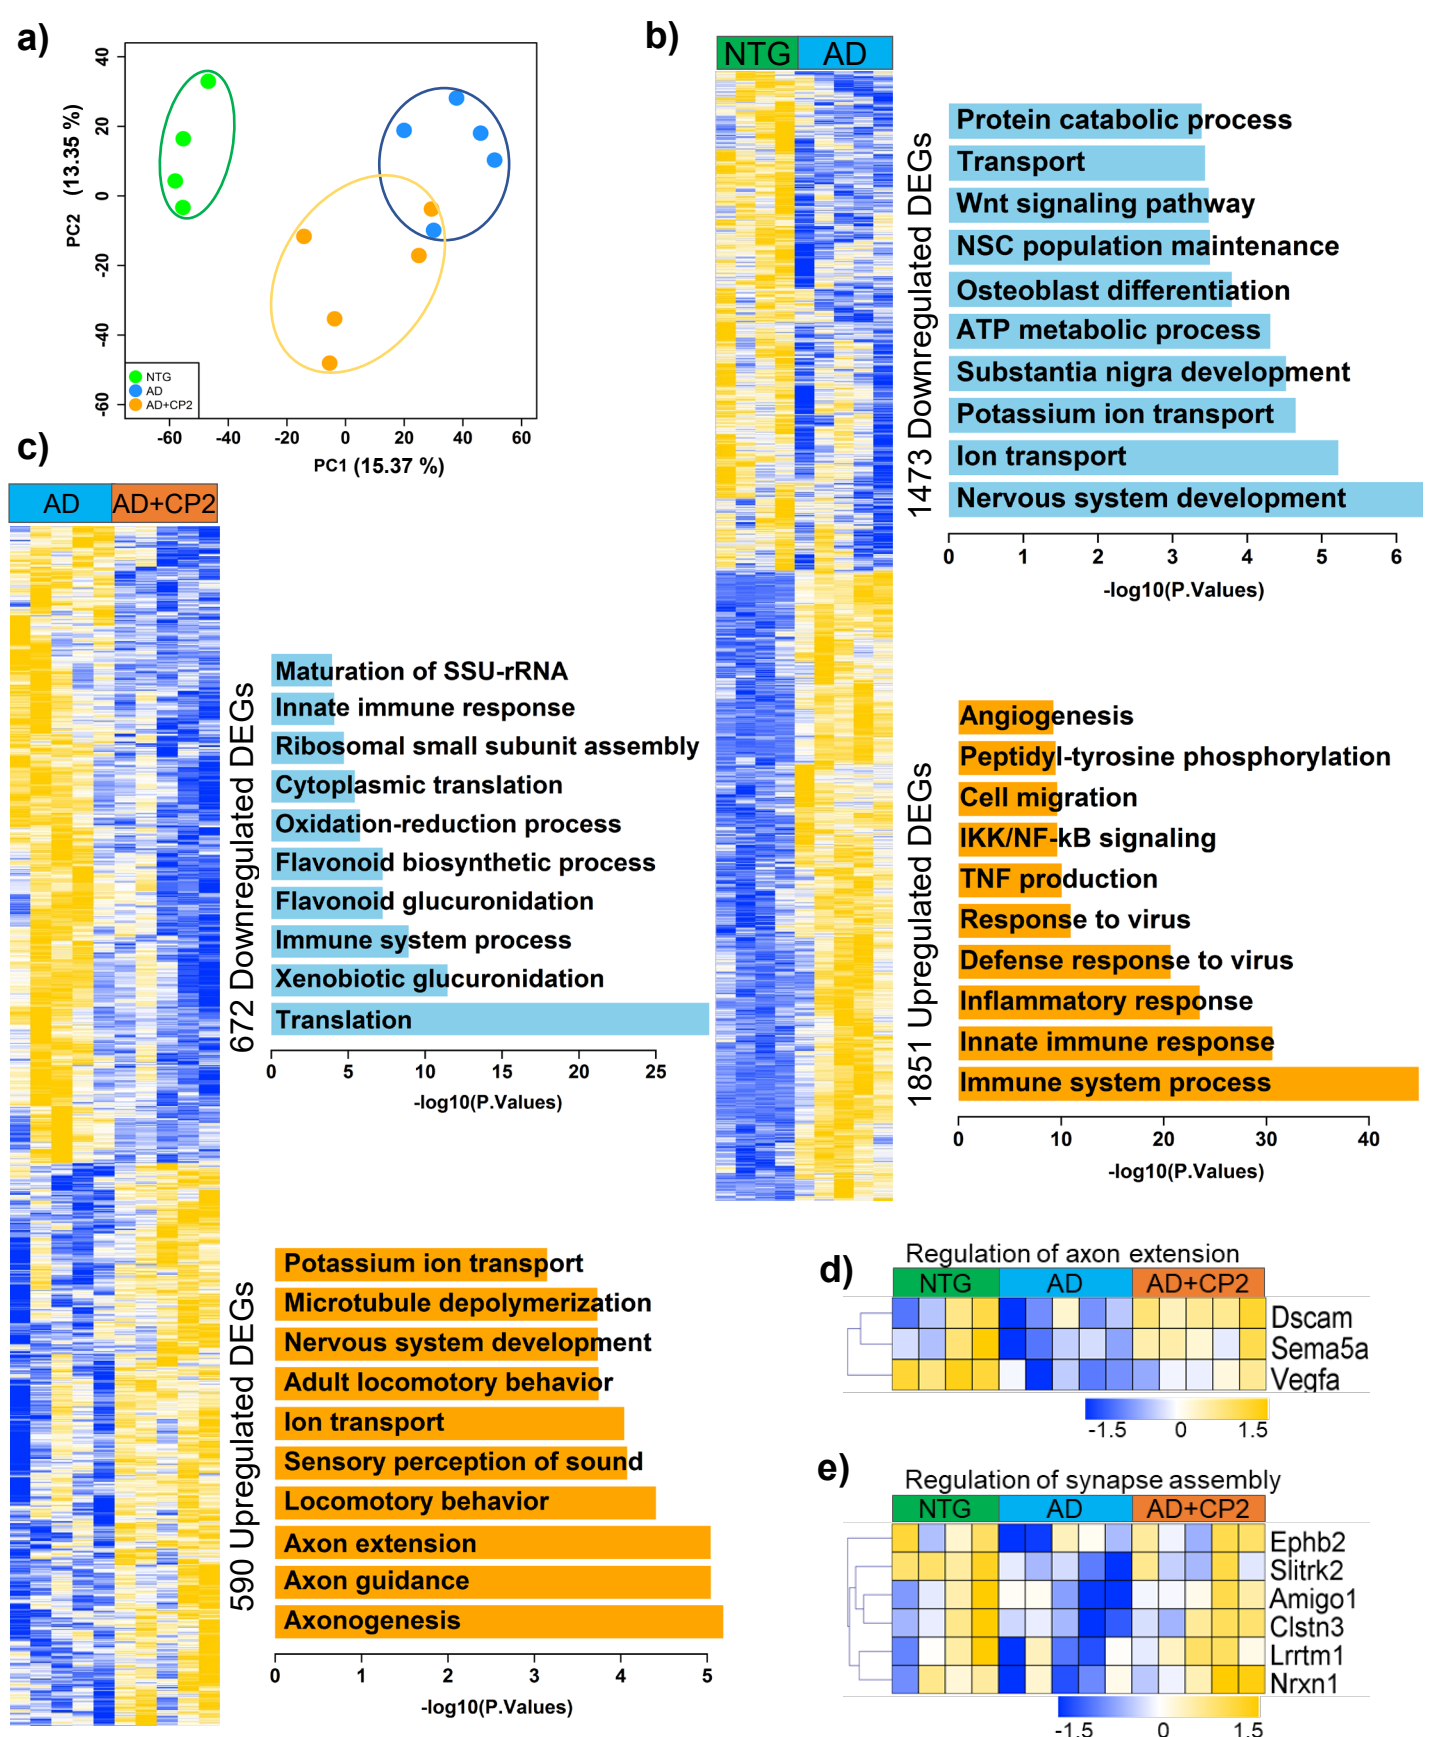

**Supplementary Figure 13. Transcriptomic changes in brain tissue from vehicle and CP2-treated NTG and APP/PS1 mice determined using RNA-seq.** **a)** Principal Component Analysis (PCA) shows separated clusters of samples among 3 groups (NTG, green; APP/PS1, blue; APP/PS1+CP2, orange) where CP2 treatment produces specific changes allowing group separation. Variances explained by the first two principal components are shown here (15.37% and 13.35%, respectively). **b)** DEGs in NTG vs. APP/PS1 mice and function enrichment analysis based on up- or down-regulated genes. **c)** DEGs in APP/PS1 vs. APP/PS1+CP2 mice and function enrichment analysis based on up- or down-regulated genes. **d)** A heatmap shows changes in genes of pathway related to the positive regulation of axon extension, which were up-regulated after CP2 treatment in APP/PS1 mice. **e)** A heatmap shows changes in genes involved in synapse assembly that were up-regulated by CP2 treatment in APP/PS1 mice. All mice were 23 months of age treated with CP2 or vehicle for 13-14 months. NTG,  $n = 4$  mice per group; APP/PS1,  $n = 5$  mice per group; APP/PS1+CP2,  $n = 5$  mice per group.

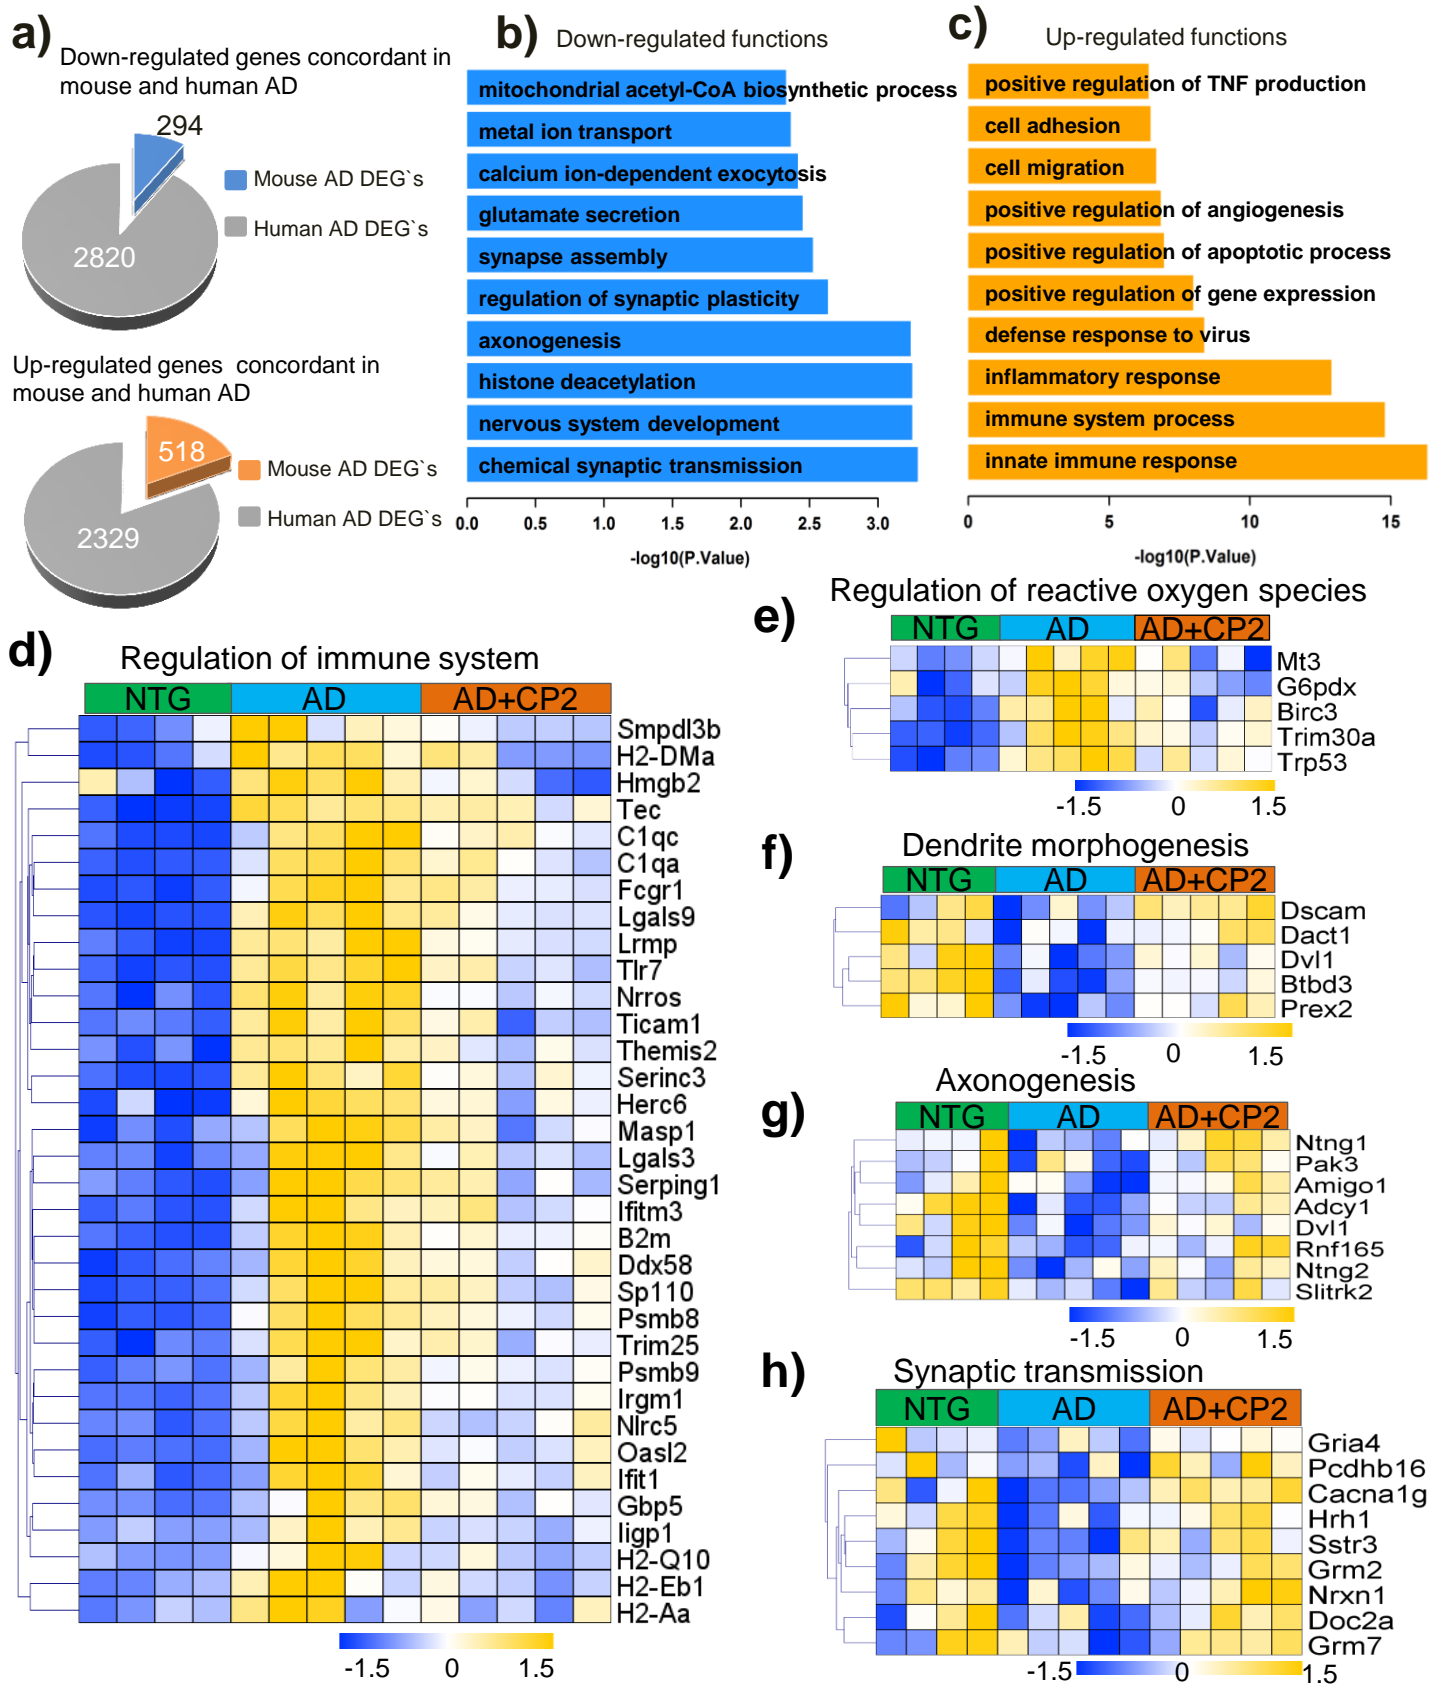

**Supplementary Figure 14. CP2 treatment affects pathways relevant to AD patients based on the cross-validation of mouse and human AMP-AD transcriptomic data.** **a)** Comparison of human DEGs from the AMP-AD set with 567 DEGs shown in Figure 8a that are specifically affected by CP2 treatment in APP/PS1 mice. **b)** Functions identified by the enrichment analysis associated with the up-regulated DEGs (567) in APP/PS1 mice mapped against human up-regulated AD DEGs. These functions were reversed (down-regulated) by CP2 treatment in APP/PS1 mice. **c)** Functions identified by the enrichment analysis associated with the down-regulated DEGs (567) in APP/PS1 mice mapped with human down-regulated AD DEGs. These functions were reversed (up-regulated) by CP2 treatment in APP/PS1 mice. **d, e)** Heatmaps of changes in genes associated with immune system (**d**) and the reactive oxygen species (**e**) were down-regulated after CP2 treatment in APP/PS1 mice. **f-h)** Heatmaps of changes in genes associated with dendrite morphogenesis (**f**), axonogenesis (**g**), and synaptic transmission (**h**) were up-regulated after CP2 treatment in APP/PS1 mice. The weight of the edges corresponds to the confidence scores of gene integration. All mice were 23-month-old treated with CP2 or vehicle for 13-14 months. NTG,  $n = 4$  mice per group; APP/PS1,  $n = 5$  mice per group; APP/PS1+CP2,  $n = 5$  per group.

Supplementary Table 1. CP2 levels in the brain tissue and plasma of NTG and APP/PS1 mice 22 – 24-month-old chronically treated with CP2 from 9 months of age<sup>a</sup>.

| Genotype | Brain (ng g <sup>-1</sup> ) | Brain (nM) | Plasma (ng ml <sup>-1</sup> ) | Plasma (nM) |
|----------|-----------------------------|------------|-------------------------------|-------------|
| NTG      | 24.77                       | 62.96      | 44.44                         | 112.95      |
| NTG      | 16.91                       | 42.98      | 138.32                        | 351.56      |
| NTG      | 14.57                       | 37.03      | 40.95                         | 104.08      |
| NTG      | 14.44                       | 36.70      | 138.28                        | 351.46      |
| NTG      | 52.22                       | 132.72     | 419.32                        | 1,065.75    |
| NTG      | 110.37                      | 280.52     | 66.7                          | 169.53      |
| NTG      | 9.97                        | 25.34      | 21.96                         | 55.81       |
| APP/PS1  | 7.34                        | 18.66      | 187.06                        | 475.44      |
| APP/PS1  | 44.37                       | 112.77     | 349.88                        | 889.26      |
| APP/PS1  | 4.52                        | 11.49      | 67.44                         | 171.41      |
| APP/PS1  | 10.36                       | 26.33      | 161.3                         | 409.96      |
| APP/PS1  | 50.23                       | 127.67     | 89.664                        | 227.89      |
| APP/PS1  | 16.36                       | 41.58      | 174.72                        | 444.07      |
| APP/PS1  | 11.99                       | 30.47      | 32.42                         | 82.40       |
| APP/PS1  | 16.37                       | 41.61      | 28.31                         | 71.95       |
| APP/PS1  | 14.23                       | 36.17      | 10.69                         | 27.17       |
| APP/PS1  | 9.15                        | 23.26      | 67.22                         | 170.85      |
| APP/PS1  | 11.51                       | 29.25      | 52.76                         | 134.10      |

<sup>a</sup> CP2 levels were measured in cerebellum. Blood for this analysis was collected at the end of the study at the time of sacrifice.

Supplementary Table 2. Results of kinome profiling for CP2 in the Nanosyn 250 Kinase panel. The number represents % inhibition at the concentration tested. Negative numbers represent increased enzyme activity. Numbers below 20 considered to be within the acceptable noise level within the plate.

| Kinase     | Conc. Tested (μM) | CP2 |
|------------|-------------------|-----|
| ABL1       | 1                 | -4  |
| ABL1       | 10                | 4   |
| AKT1       | 1                 | 3   |
| AKT1       | 10                | 6   |
| AKT2       | 1                 | 1   |
| AKT2       | 10                | -4  |
| AKT3       | 1                 | 0   |
| AKT3       | 10                | 1   |
| ALK        | 1                 | 2   |
| ALK        | 10                | -2  |
| AMP-A1B1G1 | 1                 | -3  |
| AMP-A1B1G1 | 10                | -13 |
| AMP-A2B1G1 | 1                 | 3   |
| AMP-A2B1G1 | 10                | 1   |
| ARG        | 1                 | -1  |
| ARG        | 10                | 2   |
| ARK5       | 1                 | -3  |
| ARK5       | 10                | 17  |
| AURORA-A   | 1                 | 3   |
| AURORA-A   | 10                | -4  |
| AURORA-B   | 1                 | 1   |
| AURORA-B   | 10                | 7   |
| AURORA-C   | 1                 | 3   |
| AURORA-C   | 10                | -7  |
| AXL        | 1                 | 2   |
| AXL        | 10                | -7  |

| Kinase | Conc. Tested (μM) | CP2 |
|--------|-------------------|-----|
| BLK    | 1                 | 36  |
| BLK    | 10                | 34  |
| BMX    | 1                 | 3   |
| BMX    | 10                | -6  |
| BRAF   | 1                 | 0   |
| BRAF   | 10                | -4  |
| BRK    | 1                 | -3  |
| BRK    | 10                | -15 |
| BRSK1  | 1                 | -2  |
| BRSK1  | 10                | -4  |
| BRSK2  | 1                 | -10 |
| BRSK2  | 10                | -14 |
| BTK    | 1                 | 1   |
| BTK    | 10                | 1   |
| CAMK1A | 1                 | 2   |
| CAMK1A | 10                | 1   |
| CAMK1D | 1                 | 2   |
| CAMK1D | 10                | -4  |
| CAMK2A | 1                 | -1  |
| CAMK2A | 10                | 0   |
| CAMK2B | 1                 | 1   |
| CAMK2B | 10                | 4   |
| CAMK2D | 1                 | -2  |
| CAMK2D | 10                | -1  |
| CAMK2G | 1                 | -5  |
| CAMK2G | 10                | -7  |

| Kinase        | Conc. Tested (μM) | CP2 |
|---------------|-------------------|-----|
| CAMK4         | 1                 | 0   |
| CAMK4         | 10                | -6  |
| CDK1          | 1                 | -4  |
| CDK1          | 10                | 0   |
| CDK2          | 1                 | -3  |
| CDK2          | 10                | -4  |
| CDK2-CYCLINE  | 1                 | 4   |
| CDK2-CYCLINE  | 10                | 1   |
| CDK3-CYCLINE  | 1                 | 1   |
| CDK3-CYCLINE  | 10                | -2  |
| CDK4-CYCLIND  | 1                 | -1  |
| CDK4-CYCLIND  | 10                | 3   |
| CDK5          | 1                 | 0   |
| CDK5          | 10                | 3   |
| CDK5-P25      | 1                 | 8   |
| CDK5-P25      | 10                | 2   |
| CDK6-CYCLIND3 | 1                 | 0   |
| CDK6-CYCLIND3 | 10                | -3  |
| CDK7          | 1                 | 4   |
| CDK7          | 10                | 11  |
| CDK9-CYCLINT1 | 1                 | 5   |
| CDK9-CYCLINT1 | 10                | -26 |
| CHEK1         | 1                 | -1  |
| CHEK1         | 10                | -10 |
| CHEK2         | 1                 | 1   |
| CHEK2         | 10                | -1  |
| CK1           | 1                 | 1   |
| CK1           | 10                | 19  |

| Kinase      | Conc. Tested (μM) | CP2 |
|-------------|-------------------|-----|
| CK1-EPSILON | 1                 | 2   |
| CK1-EPSILON | 10                | 30  |
| CK1-GAMMA1  | 1                 | 1   |
| CK1-GAMMA1  | 10                | 19  |
| CK1-GAMMA2  | 1                 | -3  |
| CK1-GAMMA2  | 10                | 10  |
| CK1-GAMMA3  | 1                 | 1   |
| CK1-GAMMA3  | 10                | 15  |
| CLK1        | 1                 | -6  |
| CLK1        | 10                | -6  |
| CLK2        | 1                 | -2  |
| CLK2        | 10                | 3   |
| CLK3        | 1                 | 1   |
| CLK3        | 10                | -2  |
| CLK4        | 1                 | 5   |
| CLK4        | 10                | 24  |
| CRAF        | 1                 | -1  |
| CRAF        | 10                | 0   |
| CSK         | 1                 | 0   |
| CSK         | 10                | -5  |
| DAPK1       | 1                 | 0   |
| DAPK1       | 10                | -1  |
| DAPK3       | 1                 | -2  |
| DAPK3       | 10                | 0   |
| DCAMKL2     | 1                 | -2  |
| DCAMKL2     | 10                | -5  |
| DDR1        | 1                 | 3   |
| DDR1        | 10                | 16  |

Supplementary Table 3.

| Kinase | Conc. Tested (μM) | CP2 |
|--------|-------------------|-----|
| DDR2   | 1                 | 4   |
| DDR2   | 10                | 2   |
| DYRK1A | 1                 | 4   |
| DYRK1A | 10                | 3   |
| DYRK1B | 1                 | 2   |
| DYRK1B | 10                | 6   |
| DYRK2  | 1                 | -7  |
| DYRK2  | 10                | 1   |
| DYRK3  | 1                 | 1   |
| DYRK3  | 10                | 2   |
| DYRK4  | 1                 | -2  |
| DYRK4  | 10                | -3  |
| EGFR   | 1                 | 5   |
| EGFR   | 10                | -12 |
| EPH-A1 | 1                 | -1  |
| EPH-A1 | 10                | -9  |
| EPH-A2 | 1                 | 1   |
| EPH-A2 | 10                | 0   |
| EPH-A3 | 1                 | -2  |
| EPH-A3 | 10                | -14 |
| EPH-A4 | 1                 | 0   |
| EPH-A4 | 10                | 1   |
| EPH-A5 | 1                 | -3  |
| EPH-A5 | 10                | -10 |
| EPH-A8 | 1                 | 0   |
| EPH-A8 | 10                | -9  |
| EPH-B1 | 1                 | -3  |
| EPH-B1 | 10                | -12 |
| EPH-B2 | 1                 | -3  |

| Kinase | Conc. Tested (μM) | CP2 |
|--------|-------------------|-----|
| EPH-B2 | 10                | 2   |
| EPH-B3 | 1                 | -3  |
| EPH-B3 | 10                | -10 |
| EPH-B4 | 1                 | -4  |
| EPH-B4 | 10                | -12 |
| ERB-B2 | 1                 | -6  |
| ERB-B2 | 10                | -13 |
| ERB-B4 | 1                 | 8   |
| ERB-B4 | 10                | -1  |
| FAK    | 1                 | 0   |
| FAK    | 10                | -3  |
| FER    | 1                 | -1  |
| FER    | 10                | 1   |
| FES    | 1                 | 5   |
| FES    | 10                | -3  |
| FGFR1  | 1                 | 5   |
| FGFR1  | 10                | -15 |
| FGFR2  | 1                 | 1   |
| FGFR2  | 10                | -3  |
| FGFR4  | 1                 | 0   |
| FGFR4  | 10                | -4  |
| FGR    | 1                 | 0   |
| FGR    | 10                | -38 |
| FLT-1  | 1                 | 4   |
| FLT-1  | 10                | -23 |
| FLT-3  | 1                 | 0   |
| FLT-3  | 10                | 0   |
| FLT-4  | 1                 | 1   |
| FLT-4  | 10                | 2   |

| Kinase      | Conc. Tested (μM) | CP2 |
|-------------|-------------------|-----|
| FMS         | 1                 | 4   |
| FMS         | 10                | -1  |
| FRAP1       | 1                 | 2   |
| FRAP1       | 10                | 22  |
| FYN         | 1                 | 1   |
| FYN         | 10                | 5   |
| GRK6        | 1                 | -2  |
| GRK6        | 10                | -5  |
| GRK7        | 1                 | 0   |
| GRK7        | 10                | -12 |
| GSK-3-ALPHA | 1                 | 5   |
| GSK-3-ALPHA | 10                | 47  |
| GSK-3-BETA  | 1                 | -4  |
| GSK-3-BETA  | 10                | 21  |
| HASPIN      | 1                 | 2   |
| HASPIN      | 10                | -1  |
| HCK         | 1                 | 9   |
| HCK         | 10                | -1  |
| HIPK1       | 1                 | -6  |
| HIPK1       | 10                | 2   |
| HIPK2       | 1                 | 0   |
| HIPK2       | 10                | 0   |
| HIPK3       | 1                 | -3  |
| HIPK3       | 10                | -1  |
| HIPK4       | 1                 | -2  |
| HIPK4       | 10                | -4  |
| IGF1R       | 1                 | 4   |
| IGF1R       | 10                | -4  |
| IKK-ALPHA   | 1                 | 0   |

| Kinase      | Conc. Tested (μM) | CP2 |
|-------------|-------------------|-----|
| IKK-ALPHA   | 10                | -3  |
| IKK-BETA    | 1                 | 0   |
| IKK-BETA    | 10                | 6   |
| IKK-EPSILON | 1                 | -1  |
| IKK-EPSILON | 10                | 1   |
| INSR        | 1                 | -1  |
| INSR        | 10                | 1   |
| IRAK1       | 1                 | -4  |
| IRAK1       | 10                | -4  |
| IRAK4       | 1                 | 0   |
| IRAK4       | 10                | 3   |
| IRR         | 1                 | 4   |
| IRR         | 10                | -1  |
| ITK         | 1                 | 4   |
| ITK         | 10                | -3  |
| JAK1        | 1                 | -2  |
| JAK1        | 10                | 2   |
| JAK2        | 1                 | 4   |
| JAK2        | 10                | 0   |
| JAK3        | 1                 | -2  |
| JAK3        | 10                | -11 |
| JNK1        | 1                 | 2   |
| JNK1        | 10                | 6   |
| JNK2        | 1                 | 6   |
| JNK2        | 10                | -3  |
| JNK3        | 1                 | 4   |
| JNK3        | 10                | 9   |
| KDR         | 1                 | 6   |
| KDR         | 10                | -3  |



Supplementary Table 3.

| Kinase       | Conc. Tested (μM) | CP2 |
|--------------|-------------------|-----|
| KIT          | 1                 | 0   |
| KIT          | 10                | -6  |
| LATS1        | 1                 | 0   |
| LATS1        | 10                | -9  |
| LATS2        | 1                 | 0   |
| LATS2        | 10                | 0   |
| LCK          | 1                 | 2   |
| LCK          | 10                | -10 |
| LOK          | 1                 | 4   |
| LOK          | 10                | 14  |
| LRRK2-G2019S | 1                 | 0   |
| LRRK2-G2019S | 10                | 3   |
| LTK          | 1                 | 2   |
| LTK          | 10                | -6  |
| LYNA         | 1                 | 1   |
| LYNA         | 10                | -2  |
| LYNB         | 1                 | 2   |
| LYNB         | 10                | -18 |
| MAP4K2       | 1                 | 3   |
| MAP4K2       | 10                | 2   |
| MAP4K4       | 1                 | 4   |
| MAP4K4       | 10                | 1   |
| MAP4K5       | 1                 | 1   |
| MAP4K5       | 10                | 4   |
| MAPK1        | 1                 | -1  |
| MAPK1        | 10                | -10 |
| MAPK3        | 1                 | -1  |
| MAPK3        | 10                | 3   |
| MAPKAPK-2    | 1                 | -4  |

| Kinase     | Conc. Tested (μM) | CP2 |
|------------|-------------------|-----|
| MAPKAPK-2  | 10                | 2   |
| MAPKAPK-3  | 1                 | -1  |
| MAPKAPK-3  | 10                | -3  |
| MARK1      | 1                 | 2   |
| MARK1      | 10                | 3   |
| MARK3      | 1                 | -4  |
| MARK3      | 10                | -4  |
| MARK4      | 1                 | -3  |
| MARK4      | 10                | 0   |
| MEK1       | 1                 | 2   |
| MEK1       | 10                | -1  |
| MEK2       | 1                 | -1  |
| MEK2       | 10                | 6   |
| MEK3       | 1                 | 0   |
| MEK3       | 10                | 2   |
| MELK       | 1                 | 6   |
| MELK       | 10                | 3   |
| MER        | 1                 | 2   |
| MER        | 10                | -1  |
| MET        | 1                 | 8   |
| MET        | 10                | -9  |
| MINK       | 1                 | 0   |
| MINK       | 10                | 10  |
| MKNK1      | 1                 | 0   |
| MKNK1      | 10                | 5   |
| MNK2       | 1                 | 5   |
| MNK2       | 10                | 5   |
| MRCK-ALPHA | 1                 | -2  |
| MRCK-ALPHA | 10                | -3  |

| Kinase    | Conc. Tested (μM) | CP2 |
|-----------|-------------------|-----|
| MRCK-BETA | 1                 | 0   |
| MRCK-BETA | 10                | -2  |
| MSK1      | 1                 | -1  |
| MSK1      | 10                | -13 |
| MSK2      | 1                 | 1   |
| MSK2      | 10                | -11 |
| MSSK1     | 1                 | -3  |
| MSSK1     | 10                | 2   |
| MST1      | 1                 | 3   |
| MST1      | 10                | 22  |
| MST2      | 1                 | 5   |
| MST2      | 10                | 10  |
| MST3      | 1                 | -2  |
| MST3      | 10                | -3  |
| MST4      | 1                 | -2  |
| MST4      | 10                | -5  |
| MUSK      | 1                 | 4   |
| MUSK      | 10                | -6  |
| NDR2      | 1                 | 1   |
| NDR2      | 10                | -4  |
| NDRG1     | 1                 | 0   |
| NDRG1     | 10                | -2  |
| NEK1      | 1                 | 3   |
| NEK1      | 10                | 7   |
| NEK2      | 1                 | 0   |
| NEK2      | 10                | -1  |
| NEK6      | 1                 | 4   |
| NEK6      | 10                | 1   |
| NEK7      | 1                 | 3   |

| Kinase       | Conc. Tested (μM) | CP2 |
|--------------|-------------------|-----|
| NEK7         | 10                | -20 |
| NEK9         | 1                 | 2   |
| NEK9         | 10                | 5   |
| P38-ALPHA    | 1                 | 4   |
| P38-ALPHA    | 10                | 1   |
| P38-BETA     | 1                 | 3   |
| P38-BETA     | 10                | 1   |
| P38-DELTA    | 1                 | 0   |
| P38-DELTA    | 10                | -2  |
| P38-GAMMA    | 1                 | 0   |
| P38-GAMMA    | 10                | -7  |
| P70S6K1      | 1                 | 3   |
| P70S6K1      | 10                | -1  |
| P70S6K2      | 1                 | 1   |
| P70S6K2      | 10                | -14 |
| PAK1         | 1                 | 0   |
| PAK1         | 10                | 2   |
| PAK2         | 1                 | 0   |
| PAK2         | 10                | -2  |
| PAK3         | 1                 | -1  |
| PAK3         | 10                | -3  |
| PAK4         | 1                 | 5   |
| PAK4         | 10                | 10  |
| PAK5         | 1                 | 1   |
| PAK5         | 10                | 3   |
| PAK6         | 1                 | 4   |
| PAK6         | 10                | -3  |
| PAR-1B-ALPHA | 1                 | -3  |
| PAR-1B-ALPHA | 10                | 7   |

Supplementary Table 3.

| Kinase           | Conc. Tested (μM) | CP2 |
|------------------|-------------------|-----|
| PASK             | 1                 | -5  |
| PASK             | 10                | 2   |
| PDGFR-ALPHA      | 1                 | 3   |
| PDGFR-ALPHA      | 10                | 3   |
| PDGFR-BETA       | 1                 | 4   |
| PDGFR-BETA       | 10                | -1  |
| PDK1             | 1                 | -4  |
| PDK1             | 10                | 0   |
| PERK             | 1                 | 2   |
| PERK             | 10                | -14 |
| PHK-GAMMA1       | 1                 | 3   |
| PHK-GAMMA1       | 10                | 0   |
| PHK-GAMMA2       | 1                 | 1   |
| PHK-GAMMA2       | 10                | 5   |
| PI3-KINASE-ALPHA | 1                 | 2   |
| PI3-KINASE-ALPHA | 10                | 7   |
| PI4-K-BETA       | 1                 | 0   |
| PI4-K-BETA       | 10                | -3  |
| PIM-1-KINASE     | 1                 | 0   |
| PIM-1-KINASE     | 10                | 1   |
| PIM2             | 1                 | 1   |
| PIM2             | 10                | -2  |
| PIM3             | 1                 | -1  |
| PIM3             | 10                | 0   |
| PKA              | 1                 | 2   |
| PKA              | 10                | -11 |
| PKACB            | 1                 | -1  |
| PKACB            | 10                | 0   |

| Kinase    | Conc. Tested (μM) | CP2 |
|-----------|-------------------|-----|
| PKC-ALPHA | 1                 | 1   |
| PKC-ALPHA | 10                | 0   |
| PKC-BETA1 | 1                 | 0   |
| PKC-BETA1 | 10                | 8   |
| PKC-BETA2 | 1                 | 2   |
| PKC-BETA2 | 10                | 0   |
| PKC-ETA   | 1                 | -2  |
| PKC-ETA   | 10                | 1   |
| PKC-GAMMA | 1                 | 2   |
| PKC-GAMMA | 10                | 1   |
| PKC-IOTA  | 1                 | -6  |
| PKC-IOTA  | 10                | 3   |
| PKC-THETA | 1                 | -3  |
| PKC-THETA | 10                | -1  |
| PKC-ZETA  | 1                 | -1  |
| PKC-ZETA  | 10                | -3  |
| PKN1      | 1                 | -1  |
| PKN1      | 10                | -4  |
| PKN2      | 1                 | 2   |
| PKN2      | 10                | 1   |
| PLK1      | 1                 | -1  |
| PLK1      | 10                | -19 |
| PLK3      | 1                 | -5  |
| PLK3      | 10                | 14  |
| PLK4      | 1                 | -9  |
| PLK4      | 10                | -11 |
| PRAK      | 1                 | -3  |
| PRAK      | 10                | -8  |
| PRKACA    | 1                 | -2  |

| Kinase | Conc. Tested (μM) | CP2 |
|--------|-------------------|-----|
| PRKACA | 10                | -2  |
| PRKD1  | 1                 | 7   |
| PRKD1  | 10                | -4  |
| PRKD2  | 1                 | 0   |
| PRKD2  | 10                | 2   |
| PRKD3  | 1                 | 5   |
| PRKD3  | 10                | -3  |
| PRKG1  | 1                 | 2   |
| PRKG1  | 10                | 4   |
| PRKX   | 1                 | 0   |
| PRKX   | 10                | -1  |
| PTK5   | 1                 | -1  |
| PTK5   | 10                | -3  |
| PYK2   | 1                 | 5   |
| PYK2   | 10                | -8  |
| RET    | 1                 | 3   |
| RET    | 10                | -4  |
| RIPK2  | 1                 | 0   |
| RIPK2  | 10                | -5  |
| ROCK1  | 1                 | 5   |
| ROCK1  | 10                | -1  |
| ROCK2  | 1                 | 7   |
| ROCK2  | 10                | 16  |
| RON    | 1                 | 8   |
| RON    | 10                | -12 |
| ROS    | 1                 | 4   |
| ROS    | 10                | -5  |
| RSK1   | 1                 | 2   |
| RSK1   | 10                | 0   |

| Kinase  | Conc. Tested (μM) | CP2 |
|---------|-------------------|-----|
| RSK2    | 1                 | -2  |
| RSK2    | 10                | -6  |
| RSK3    | 1                 | -3  |
| RSK3    | 10                | -1  |
| RSK4    | 1                 | -1  |
| RSK4    | 10                | -1  |
| SGK1    | 1                 | 1   |
| SGK1    | 10                | 1   |
| SGK2    | 1                 | -4  |
| SGK2    | 10                | 1   |
| SGK3    | 1                 | 5   |
| SGK3    | 10                | -5  |
| SIK     | 1                 | 4   |
| SIK     | 10                | 1   |
| SLK     | 1                 | -2  |
| SLK     | 10                | 4   |
| SNF1LK2 | 1                 | 4   |
| SNF1LK2 | 10                | 1   |
| SPHK1   | 1                 | 3   |
| SPHK1   | 10                | 0   |
| SPHK2   | 1                 | 4   |
| SPHK2   | 10                | -4  |
| SRC     | 1                 | 2   |
| SRC     | 10                | -18 |
| SRMS    | 1                 | -6  |
| SRMS    | 10                | -10 |
| SRPK1   | 1                 | 3   |
| SRPK1   | 10                | -8  |
| SRPK2   | 1                 | -3  |

**Supplementary Table 3.**

| Kinase    | Conc. Tested (μM) | CP2 |
|-----------|-------------------|-----|
| SRPK2     | 10                | 0   |
| STK16     | 1                 | 1   |
| STK16     | 10                | -5  |
| STK25     | 1                 | -1  |
| STK25     | 10                | 2   |
| SYK       | 1                 | 6   |
| SYK       | 10                | -15 |
| TAK1-TAB1 | 1                 | -1  |
| TAK1-TAB1 | 10                | -1  |
| TAOK2     | 1                 | -2  |
| TAOK2     | 10                | -1  |
| TAOK3     | 1                 | 3   |
| TAOK3     | 10                | -2  |
| TBK1      | 1                 | -2  |
| TBK1      | 10                | -7  |
| TEC       | 1                 | 2   |
| TEC       | 10                | 1   |
| TIE2      | 1                 | 0   |
| TIE2      | 10                | -9  |
| TNIK      | 1                 | 1   |
| TNIK      | 10                | 1   |
| TNK2      | 1                 | 3   |
| TNK2      | 10                | 2   |
| TRKA      | 1                 | 2   |
| TRKA      | 10                | -5  |
| TRKB      | 1                 | 5   |
| TRKB      | 10                | -3  |
| TRKC      | 1                 | 3   |
| TRKC      | 10                | -3  |

| Kinase | Conc. Tested (μM) | CP2 |
|--------|-------------------|-----|
| TSSK1  | 1                 | -2  |
| TSSK1  | 10                | 7   |
| TSSK2  | 1                 | -2  |
| TSSK2  | 10                | 1   |
| TTK    | 1                 | 2   |
| TTK    | 10                | 4   |
| TXK    | 1                 | 6   |
| TXK    | 10                | -5  |
| TYK2   | 1                 | 4   |
| TYK2   | 10                | -7  |
| TYRO3  | 1                 | 0   |
| TYRO3  | 10                | -4  |
| YES    | 1                 | -1  |
| YES    | 10                | -4  |
| ZAP70  | 1                 | -15 |
| ZAP70  | 10                | -3  |

Supplementary Table 3. Results of the Eurofin Cerep Safety-Screen 44 Panel (enzymes)

| Assay                    | Test Concentration (M) | % Inhibition of Control Values |
|--------------------------|------------------------|--------------------------------|
| COX1 (h)                 | 1.0E-05                | 17                             |
| COX2 (h)                 | 1.0E-05                | 17                             |
| PDE3A (h)                | 1.0E-05                | 13                             |
| PDE4D2 (h)               | 1.0E-05                | 28                             |
| Lck kinase (h)           | 1.0E-05                | -5                             |
| acetylcholinesterase (h) | 1.0E-05                | 33                             |

In vitro pharmacological profiling and assessment of the potential for off-target interactions of CP2 in binding screens (Eurofins Cerep-Panlabs SafetyScreen 44). The compound was screened at a 10  $\mu$ M concentration in duplicate for its potential to interfere with the binding of native ligands of 44 different receptors, ion channels and enzymes. For enzyme assays, the inhibition effect was calculated as percent inhibition of control enzyme activity. Tests were performed in duplicate and results are averages of those two tests. Results showing an inhibition (or stimulation for assays run in basal conditions) higher than 50% are considered to represent significant effect of the test compound. Results showing an inhibition (or stimulation) between 25% and 50% are indicative of weak to moderate effect. Results showing an inhibition (or stimulation) lower than 25% are not considered significant and mostly attributable to variability of the signal around the control level.

Supplementary Table 4. Results of the Eurofin Cerep Safety-Screen 44 Panel (receptors and ion channels)<sup>a</sup>

| Assay                                                                       | Test concentration (M) | % Inhibition of Control Specific Binding |
|-----------------------------------------------------------------------------|------------------------|------------------------------------------|
| A2A (h) (agonist radioligand)                                               | 1.0E-05                | 15                                       |
| alpha 1A (h) (antagonist radioligand)                                       | 1.0E-05                | 12                                       |
| alpha 2A (h) (antagonist radioligand)                                       | 1.0E-05                | -7                                       |
| beta 1 (h) (agonist radioligand)                                            | 1.0E-05                | 5                                        |
| beta 2 (h) (agonist radioligand)                                            | 1.0E-05                | -1                                       |
| BZD (central) (agonist radioligand)                                         | 1.0E-05                | 11                                       |
| CB1 (h) (agonist radioligand)                                               | 1.0E-05                | -14                                      |
| CB2 (h) (agonist radioligand)                                               | 1.0E-05                | -6                                       |
| CCK1 (CCKA) (h) (agonist radioligand)                                       | 1.0E-05                | -3                                       |
| D1 (h) (antagonist radioligand)                                             | 1.0E-05                | -9                                       |
| D2S (h) (agonist radioligand)                                               | 1.0E-05                | 0                                        |
| ETA (h) (agonist radioligand)                                               | 1.0E-05                | -1                                       |
| NMDA (antagonist radioligand)                                               | 1.0E-05                | 3                                        |
| H1 (h) (antagonist radioligand)                                             | 1.0E-05                | 8                                        |
| H2 (h) (antagonist radioligand)                                             | 1.0E-05                | -3                                       |
| MAO-A (antagonist radioligand)                                              | 1.0E-05                | 25                                       |
| M1 (h) (antagonist radioligand)                                             | 1.0E-05                | 35                                       |
| M2 (h) (antagonist radioligand)                                             | 1.0E-05                | 50                                       |
| M3 (h) (antagonist radioligand)                                             | 1.0E-05                | 30                                       |
| N neuronal alpha 4beta 2 (h) (agonist radioligand)                          | 1.0E-05                | 5                                        |
| delta 2 (DOP) (h) (agonist radioligand)                                     | 1.0E-05                | 26                                       |
| kappa (KOP) (agonist radioligand)                                           | 1.0E-05                | 3                                        |
| mu (MOP) (h) (agonist radioligand)                                          | 1.0E-05                | 28                                       |
| 5-HT1A (h) (agonist radioligand)                                            | 1.0E-05                | 0                                        |
| 5-HT1B (antagonist radioligand)                                             | 1.0E-05                | -12                                      |
| 5-HT2A (h) (agonist radioligand)                                            | 1.0E-05                | -2                                       |
| 5-HT2B (h) (agonist radioligand)                                            | 1.0E-05                | 1                                        |
| 5-HT3 (h) (antagonist radioligand)                                          | 1.0E-05                | 0                                        |
| GR (h) (agonist radioligand)                                                | 1.0E-05                | 3                                        |
| AR (h) (agonist radioligand)                                                | 1.0E-05                | 18                                       |
| V1a (h) (agonist radioligand)                                               | 1.0E-05                | 10                                       |
| Ca <sup>2+</sup> channel (L, dihydropyridine site) (antagonist radioligand) | 1.0E-05                | 8                                        |
| Potassium Channel hERG (human), [3H] Dofetilide                             | 1.0E-05                | 71                                       |
| KV channel (antagonist radioligand)                                         | 1.0E-05                | -4                                       |
| Na <sup>+</sup> channel (site 2) (antagonist radioligand)                   | 1.0E-05                | 34                                       |
| norepinephrine transporter (h) (antagonist radioligand)                     | 1.0E-05                | 8                                        |
| dopamine transporter (h) (antagonist radioligand)                           | 1.0E-05                | 32                                       |
| 5-HT transporter (h) (antagonist radioligand)                               | 1.0E-05                | 0                                        |

<sup>a</sup>In vitro pharmacological profiling and assessment of the potential for off-target interactions of CP2 in binding screens (Eurofins Cerep-Panlabs SafetyScreen 44). The compound was screened at a 10 μM concentration in duplicate for its potential to interfere with the binding of native ligands of 44 different receptors, ion channels and enzymes. For receptor assays, compound binding was calculated as percent inhibition of the binding of a radioactively labeled ligand specific for each target. Tests were performed in duplicate and results are averages of those two tests. Results showing an inhibition (or stimulation for assays run in basal conditions) higher than 50% are considered to represent significant effect of the test compound. Results showing an inhibition (or stimulation) between 25% and 50% are indicative of weak to moderate effect. Results showing an inhibition (or stimulation) lower than 25% are not considered significant and mostly attributable to variability of the signal around the control level.

Supplementary Table 5. Effect of CP2 treatment on brain metabolite levels in APP/PS1 and NTG mice<sup>a</sup>.

| BRAIN                   | APP/PS1   |          | APP/PS1 (CP2) |          | t-test APP/PS1-CP2 | NTG       |          | NTG(CP2)  |          | t-test NTG-CP2 |
|-------------------------|-----------|----------|---------------|----------|--------------------|-----------|----------|-----------|----------|----------------|
|                         | $\bar{X}$ | $\pm$ SE | $\bar{X}$     | $\pm$ SE | P values           | $\bar{X}$ | $\pm$ SE | $\bar{X}$ | $\pm$ SE | P values       |
| 2-Hydroxyglutarate      | 1.28      | 0.10     | 1.19          | 0.11     | 0.307              | 0.76      | 0.09     | 0.93      | 0.20     | 0.265          |
| $\gamma$ -Aminobutyrate | 0.89      | 0.05     | 1.07          | 0.07     | 0.062              | 0.98      | 0.15     | 0.96      | 0.04     | 0.448          |
| Adenosine               | 1.25      | 0.09     | 0.97          | 0.16     | 0.119              | 0.96      | 0.18     | 0.76      | 0.06     | 0.195          |
| ADP                     | 0.89      | 0.08     | 1.08          | 0.06     | 0.078              | 1.03      | 0.09     | 1.01      | 0.08     | 0.458          |
| Alanine                 | 0.94      | 0.02     | 1.27          | 0.11     | <b>0.033</b>       | 0.96      | 0.07     | 0.94      | 0.07     | 0.433          |
| AMP                     | 0.97      | 0.04     | 1.20          | 0.02     | <b>0.003</b>       | 0.89      | 0.04     | 0.91      | 0.05     | 0.395          |
| Ascorbate               | 0.95      | 0.14     | 1.59          | 0.22     | <b>0.039</b>       | 0.76      | 0.18     | 0.74      | 0.20     | 0.472          |
| Aspartate               | 0.52      | 0.05     | 0.90          | 0.22     | 0.107              | 0.94      | 0.18     | 1.35      | 0.16     | 0.088          |
| ATP                     | 0.78      | 0.15     | 1.15          | 0.23     | 0.140              | 1.10      | 0.18     | 1.02      | 0.14     | 0.387          |
| $\beta$ -Alanine        | 0.30      | 0.11     | 1.11          | 0.08     | <b>0.001</b>       | 0.88      | 0.22     | 0.86      | 0.10     | 0.469          |
| Cholesterol             | 0.84      | 0.20     | 0.69          | 0.29     | 0.359              | 1.18      | 0.38     | 1.46      | 0.51     | 0.351          |
| Citrate                 | 0.91      | 0.04     | 1.04          | 0.01     | <b>0.029</b>       | 1.07      | 0.04     | 0.98      | 0.09     | 0.238          |
| Creatinine              | 1.02      | 0.11     | 1.13          | 0.03     | 0.216              | 1.04      | 0.08     | 0.81      | 0.08     | 0.058          |
| Dehydroascorbate        | 0.70      | 0.06     | 1.61          | 0.26     | <b>0.025</b>       | 0.83      | 0.17     | 1.01      | 0.21     | 0.294          |
| Ethanolamine            | 0.89      | 0.16     | 1.17          | 0.07     | 0.118              | 1.07      | 0.11     | 1.13      | 0.07     | 0.333          |
| Fumarate                | 0.67      | 0.32     | 1.13          | 0.26     | 0.181              | 0.56      | 0.23     | 1.17      | 0.21     | 0.064          |
| Galactose               | 0.95      | 0.12     | 1.03          | 0.24     | 0.395              | 0.84      | 0.09     | 1.15      | 0.18     | 0.123          |
| GDP                     | 0.84      | 0.04     | 1.13          | 0.03     | <b>0.002</b>       | 0.92      | 0.13     | 1.04      | 0.05     | 0.237          |
| Glucopyranose           | 1.56      | 0.17     | 1.08          | 0.13     | <b>0.045</b>       | 0.89      | 0.13     | 0.42      | 0.06     | <b>0.019</b>   |
| Glutamate               | 0.99      | 0.09     | 1.15          | 0.15     | 0.210              | 1.05      | 0.10     | 0.91      | 0.25     | 0.337          |
| Glycerate               | 1.03      | 0.15     | 0.78          | 0.06     | 0.117              | 1.19      | 0.09     | 0.74      | 0.06     | <b>0.005</b>   |
| Glycerol -1-P           | 1.00      | 0.05     | 1.05          | 0.06     | 0.267              | 1.00      | 0.11     | 1.02      | 0.10     | 0.461          |
| Glycine                 | 0.69      | 0.04     | 0.88          | 0.08     | 0.053              | 0.97      | 0.10     | 1.10      | 0.03     | 0.159          |
| Glycolate               | 0.56      | 0.21     | 0.17          | 0.00     | 0.094              | 0.69      | 0.12     | 1.00      | 0.12     | 0.081          |
| GTP                     | 0.88      | 0.05     | 1.19          | 0.07     | <b>0.012</b>       | 0.98      | 0.07     | 0.96      | 0.08     | 0.441          |
| Iminodiacetate          | 1.13      | 0.08     | 0.86          | 0.21     | 0.172              | 0.91      | 0.24     | 0.55      | 0.14     | 0.153          |
| Lactate                 | 1.10      | 0.03     | 1.04          | 0.01     | 0.057              | 0.93      | 0.06     | 0.95      | 0.01     | 0.393          |
| Malate                  | 0.96      | 0.09     | 0.98          | 0.07     | 0.448              | 1.02      | 0.02     | 1.09      | 0.11     | 0.319          |
| Myo-Inositol            | 0.91      | 0.03     | 1.04          | 0.06     | 0.072              | 1.00      | 0.05     | 0.98      | 0.03     | 0.364          |
| NAA                     | 0.94      | 0.02     | 1.10          | 0.03     | <b>0.004</b>       | 1.00      | 0.06     | 1.04      | 0.09     | 0.369          |
| Phosphocolamine         | 0.84      | 0.07     | 1.16          | 0.13     | 0.061              | 0.90      | 0.07     | 1.11      | 0.05     | <b>0.036</b>   |
| Pi                      | 0.86      | 0.07     | 0.98          | 0.02     | 0.119              | 1.00      | 0.04     | 1.07      | 0.04     | 0.152          |
| Pyroglutamate           | 0.52      | 0.07     | 0.84          | 0.07     | <b>0.011</b>       | 0.94      | 0.15     | 1.28      | 0.07     | 0.070          |
| Serine                  | 0.65      | 0.05     | 0.97          | 0.05     | <b>0.003</b>       | 0.91      | 0.10     | 1.20      | 0.09     | <b>0.050</b>   |
| Stearate                | 1.03      | 0.04     | 0.93          | 0.05     | 0.111              | 0.96      | 0.16     | 1.15      | 0.14     | 0.225          |
| Succinate               | 1.08      | 0.10     | 1.07          | 0.13     | 0.489              | 0.98      | 0.06     | 0.91      | 0.13     | 0.352          |
| Threonate               | 0.89      | 0.07     | 1.03          | 0.14     | 0.225              | 1.17      | 0.10     | 1.10      | 0.13     | 0.375          |
| Urea                    | 1.04      | 0.08     | 1.20          | 0.03     | 0.092              | 0.94      | 0.08     | 0.71      | 0.04     | <b>0.037</b>   |
| Valine                  | 0.47      | 0.11     | 0.96          | 0.10     | <b>0.013</b>       | 0.79      | 0.14     | 0.43      | 0.08     | <b>0.050</b>   |

<sup>a</sup>Metabolomics was conducted in mice treated with CP2 or vehicle for 6 months. 5 mice were included in each group. Data were analyzed by unpaired Student *t*-test.  $P < 0.05$  was considered significant.

Bold italic indicates significant changes
